# Supplementary material
Source: publisher figshare collection journal article supplement (https://acs.figshare.com/ndownloader/files/4502386)
Supplement: Supplementary file 1 [file 4502386]

# SUBMISSION DETAILS

_publ_contact_author_name           'Asako Igashira-Kamiyama'
_publ_contact_author_address
; Department of Chemistry, Graduate School of Science,
  Osaka University, Toyonaka 560-0043, JAPAN
;
_publ_contact_author_email     ' igashira@chem.sci.osaka-u.ac.jp '
_publ_contact_author_fax         ' 81-6-6850-5765 '
_publ_contact_author_phone     ' 81-6-6850-5786 '
_publ_requested_journal           ' Inorg. Chem.'

# TITLE AND AUTHOR LIST
_publ_section_title
;Syntheses, Structures, and Magnetic Properties of 
Tetramanganese(III) and Hexamanganese(III) Complexes 
Containing Derivative of Biguanidate Ligand: Ferromagnetic 
Interaction via Imino Nitrogen 
;
_publ_author_name         
;Asako Igashira-Kamiyama, Takashi Kajiwara, Motohiro Nakano, 
Takumi Konno, and Tasuku Ito
;


 
data_H3pzbgCl 
 
_audit_creation_method            SHELXL-97 
_chemical_name_systematic 
; 
 ? 
; 
_chemical_name_common             ? 
_chemical_melting_point           ? 
_chemical_formula_moiety          ? 
_chemical_formula_sum 
 'C5 H11 Cl N6 O' 
_chemical_formula_weight          206.65 
 
loop_ 
 _atom_type_symbol 
 _atom_type_description 
 _atom_type_scat_dispersion_real 
 _atom_type_scat_dispersion_imag 
 _atom_type_scat_source 
 'C'  'C'   0.0033   0.0016 
 'International Tables Vol C Tables 4.2.6.8 and 6.1.1.4' 
 'H'  'H'   0.0000   0.0000 
 'International Tables Vol C Tables 4.2.6.8 and 6.1.1.4' 
 'N'  'N'   0.0061   0.0033 
 'International Tables Vol C Tables 4.2.6.8 and 6.1.1.4' 
 'O'  'O'   0.0106   0.0060 
 'International Tables Vol C Tables 4.2.6.8 and 6.1.1.4' 
 'Cl'  'Cl'   0.1484   0.1585 
 'International Tables Vol C Tables 4.2.6.8 and 6.1.1.4' 
 
_symmetry_cell_setting            Monoclinic 
_symmetry_space_group_name_H-M    P2(1)/c 
 
loop_ 
 _symmetry_equiv_pos_as_xyz 
 'x, y, z' 
 '-x, y+1/2, -z+1/2' 
 '-x, -y, -z' 
 'x, -y-1/2, z-1/2' 
 
_cell_length_a                    12.4347(16) 
_cell_length_b                    5.2803(7) 
_cell_length_c                    14.927(2) 
_cell_angle_alpha                 90.00 
_cell_angle_beta                  104.904(3) 
_cell_angle_gamma                 90.00 
_cell_volume                      947.2(2) 
_cell_formula_units_Z             4 
_cell_measurement_temperature     243(2) 
_cell_measurement_reflns_used     847 
_cell_measurement_theta_min       1.69 
_cell_measurement_theta_max       27.53
 
_exptl_crystal_description        prism 
_exptl_crystal_colour             colorless 
_exptl_crystal_size_max           0.4 
_exptl_crystal_size_mid           0.35 
_exptl_crystal_size_min           0.3 
_exptl_crystal_density_meas       ? 
_exptl_crystal_density_diffrn     1.449 
_exptl_crystal_density_method     'not measured' 
_exptl_crystal_F_000              432 
_exptl_absorpt_coefficient_mu     0.377 
_exptl_absorpt_correction_type    empirical 
_exptl_absorpt_correction_T_min   0.593870 
_exptl_absorpt_correction_T_max   0.887863
_exptl_absorpt_process_details    ? 
 
_exptl_special_details 
; 
 ? 
; 
 
_diffrn_ambient_temperature       243(2) 
_diffrn_radiation_wavelength      0.71073 
_diffrn_radiation_type            MoK\a 
_diffrn_radiation_source          'fine-focus sealed tube' 
_diffrn_radiation_monochromator   graphite 
_diffrn_measurement_device_type   'CCD area detector' 
_diffrn_measurement_method        'phi and omega scans' 
_diffrn_detector_area_resol_mean  ? 
_diffrn_standards_number          ? 
_diffrn_standards_interval_count  ? 
_diffrn_standards_interval_time   ? 
_diffrn_standards_decay_%         ? 
_diffrn_reflns_number             5863 
_diffrn_reflns_av_R_equivalents   0.0239 
_diffrn_reflns_av_sigmaI/netI     0.0288 
_diffrn_reflns_limit_h_min        -16 
_diffrn_reflns_limit_h_max        16 
_diffrn_reflns_limit_k_min        -6 
_diffrn_reflns_limit_k_max        6 
_diffrn_reflns_limit_l_min        -11 
_diffrn_reflns_limit_l_max        19 
_diffrn_reflns_theta_min          1.69 
_diffrn_reflns_theta_max          27.53 
_reflns_number_total              2170 
_reflns_number_gt                 1832 
_reflns_threshold_expression      >2sigma(I) 
 
_computing_data_collection        'Bruker SMART' 
_computing_cell_refinement        'Bruker SMART' 
_computing_data_reduction         'Bruker SHELXTL' 
_computing_structure_solution     'SHELXS-97 (Sheldrick, 1990)' 
_computing_structure_refinement   'SHELXL-97 (Sheldrick, 1997)' 
_computing_molecular_graphics     'Bruker SHELXTL' 
_computing_publication_material   'Bruker SHELXTL' 
 
_refine_special_details 
; 
 Refinement of F^2^ against ALL reflections.  The weighted R-factor wR and 
 goodness of fit S are based on F^2^, conventional R-factors R are based 
 on F, with F set to zero for negative F^2^. The threshold expression of 
 F^2^ > 2sigma(F^2^) is used only for calculating R-factors(gt) etc. and is 
 not relevant to the choice of reflections for refinement.  R-factors based 
 on F^2^ are statistically about twice as large as those based on F, and R- 
 factors based on ALL data will be even larger. 
; 
 
_refine_ls_structure_factor_coef  Fsqd  
_refine_ls_matrix_type            full 
_refine_ls_weighting_scheme       calc  
_refine_ls_weighting_details 
 'calc w=1/[\s^2^(Fo^2^)+(0.0755P)^2^+0.0000P] where P=(Fo^2^+2Fc^2^)/3' 
_atom_sites_solution_primary      direct 
_atom_sites_solution_secondary    difmap 
_atom_sites_solution_hydrogens    geom 
_refine_ls_hydrogen_treatment     refall 
_refine_ls_extinction_method      none 
_refine_ls_extinction_coef        ? 
_refine_ls_number_reflns          2170 
_refine_ls_number_parameters      162 
_refine_ls_number_restraints      0 
_refine_ls_R_factor_all           0.0504 
_refine_ls_R_factor_gt            0.0444 
_refine_ls_wR_factor_ref          0.1115 
_refine_ls_wR_factor_gt           0.1083 
_refine_ls_goodness_of_fit_ref    1.018 
_refine_ls_restrained_S_all       1.018 
_refine_ls_shift/su_max           0.000 
_refine_ls_shift/su_mean          0.000 
 
loop_ 
 _atom_site_label 
 _atom_site_type_symbol 
 _atom_site_fract_x 
 _atom_site_fract_y 
 _atom_site_fract_z 
 _atom_site_U_iso_or_equiv 
 _atom_site_adp_type 
 _atom_site_occupancy 
 _atom_site_symetry_multiplicity 
 _atom_site_calc_flag 
 _atom_site_refinement_flags 
 _atom_site_disorder_assembly 
 _atom_site_disorder_group 
N1 N 0.92215(13) 0.5747(3) 0.63292(11) 0.0376(4) Uani 1 1 d . . . 
H1 H 0.8869(18) 0.703(4) 0.6531(15) 0.053(6) Uiso 1 1 d . . . 
H2 H 0.986(2) 0.549(4) 0.6656(16) 0.047(6) Uiso 1 1 d . . . 
N2 N 0.76685(11) 0.4888(2) 0.51623(10) 0.0293(3) Uani 1 1 d . . . 
N3 N 0.59050(10) 0.4041(2) 0.43015(8) 0.0241(3) Uani 1 1 d . . . 
N4 N 0.49491(10) 0.2657(2) 0.41473(9) 0.0276(3) Uani 1 1 d . . . 
N5 N 0.91895(12) 0.2141(3) 0.54762(11) 0.0355(3) Uani 1 1 d . . . 
H3 H 0.9829(18) 0.179(4) 0.5765(14) 0.045(6) Uiso 1 1 d . . . 
H4 H 0.8874(19) 0.134(5) 0.4988(16) 0.054(6) Uiso 1 1 d . . . 
N6 N 0.67652(12) 0.1090(3) 0.53786(10) 0.0304(3) Uani 1 1 d . . . 
H5 H 0.6167(18) 0.030(3) 0.5257(14) 0.037(5) Uiso 1 1 d . . . 
H6 H 0.7205(18) 0.073(4) 0.5863(15) 0.036(5) Uiso 1 1 d . . . 
C1 C 0.86942(12) 0.4199(3) 0.56712(11) 0.0279(3) Uani 1 1 d . . . 
C2 C 0.68502(11) 0.3295(3) 0.49854(10) 0.0234(3) Uani 1 1 d . . . 
C3 C 0.57768(13) 0.6164(3) 0.37614(11) 0.0289(3) Uani 1 1 d . . . 
H7 H 0.6388(15) 0.731(4) 0.3806(13) 0.041(5) Uiso 1 1 d . . . 
C4 C 0.47128(14) 0.6145(3) 0.32343(11) 0.0314(4) Uani 1 1 d . . . 
H8 H 0.4359(15) 0.730(4) 0.2795(13) 0.037(5) Uiso 1 1 d . . . 
C5 C 0.42376(13) 0.3939(3) 0.34966(11) 0.0301(3) Uani 1 1 d . . . 
H9 H 0.3487(15) 0.329(3) 0.3246(12) 0.035(5) Uiso 1 1 d . . . 
Cl1 Cl 0.82088(3) 0.48489(8) 0.24970(3) 0.03604(17) Uani 1 1 d . . . 
O1 O 0.84565(15) 0.9787(3) 0.36937(10) 0.0504(4) Uani 1 1 d . . . 
H10 H 0.823(2) 0.843(5) 0.3386(19) 0.082(9) Uiso 1 1 d . . . 
H11 H 0.831(3) 1.109(6) 0.333(2) 0.102(11) Uiso 1 1 d . . . 
 
loop_ 
 _atom_site_aniso_label 
 _atom_site_aniso_U_11 
 _atom_site_aniso_U_22 
 _atom_site_aniso_U_33 
 _atom_site_aniso_U_23 
 _atom_site_aniso_U_13 
 _atom_site_aniso_U_12 
N1 0.0240(8) 0.0390(8) 0.0431(9) -0.0091(7) -0.0034(7) -0.0005(6) 
N2 0.0222(7) 0.0257(7) 0.0362(8) 0.0005(5) 0.0009(6) -0.0005(5) 
N3 0.0210(6) 0.0232(6) 0.0258(6) 0.0014(5) 0.0023(5) -0.0011(5) 
N4 0.0221(6) 0.0288(7) 0.0293(7) 0.0011(5) 0.0017(5) -0.0047(5) 
N5 0.0247(7) 0.0414(8) 0.0362(8) -0.0071(7) 0.0001(6) 0.0079(6) 
N6 0.0227(7) 0.0296(7) 0.0340(8) 0.0061(6) -0.0018(6) -0.0015(6) 
C1 0.0217(7) 0.0305(8) 0.0305(8) 0.0025(6) 0.0050(6) -0.0011(6) 
C2 0.0201(7) 0.0247(7) 0.0241(7) -0.0023(5) 0.0032(5) 0.0028(6) 
C3 0.0287(8) 0.0266(8) 0.0308(8) 0.0036(6) 0.0066(6) 0.0001(6) 
C4 0.0306(8) 0.0329(9) 0.0285(8) 0.0054(7) 0.0036(6) 0.0046(7) 
C5 0.0221(8) 0.0369(9) 0.0286(8) 0.0005(7) 0.0020(6) -0.0005(6) 
Cl1 0.0333(3) 0.0348(3) 0.0338(3) 0.00069(15) -0.00265(18) 0.00224(16) 
O1 0.0705(11) 0.0366(8) 0.0371(8) -0.0018(6) 0.0010(7) -0.0039(7) 
 
_geom_special_details 
; 
 All esds (except the esd in the dihedral angle between two l.s. planes) 
 are estimated using the full covariance matrix.  The cell esds are taken 
 into account individually in the estimation of esds in distances, angles 
 and torsion angles; correlations between esds in cell parameters are only 
 used when they are defined by crystal symmetry.  An approximate (isotropic) 
 treatment of cell esds is used for estimating esds involving l.s. planes. 
; 
 
loop_ 
 _geom_bond_atom_site_label_1 
 _geom_bond_atom_site_label_2 
 _geom_bond_distance 
 _geom_bond_site_symmetry_2 
 _geom_bond_publ_flag 
N1 C1 1.316(2) . ? 
N1 H1 0.90(2) . ? 
N1 H2 0.83(2) . ? 
N2 C2 1.2939(19) . ? 
N2 C1 1.356(2) . ? 
N3 N4 1.3635(17) . ? 
N3 C3 1.366(2) . ? 
N3 C2 1.4005(18) . ? 
N4 C5 1.320(2) . ? 
N5 C1 1.318(2) . ? 
N5 H3 0.82(2) . ? 
N5 H4 0.85(2) . ? 
N6 C2 1.321(2) . ? 
N6 H5 0.83(2) . ? 
N6 H6 0.81(2) . ? 
C3 C4 1.354(2) . ? 
C3 H7 0.961(19) . ? 
C4 C5 1.406(2) . ? 
C4 H8 0.922(19) . ? 
C5 H9 0.973(18) . ? 
O1 H10 0.86(3) . ? 
O1 H11 0.86(3) . ? 
 
loop_ 
 _geom_angle_atom_site_label_1 
 _geom_angle_atom_site_label_2 
 _geom_angle_atom_site_label_3 
 _geom_angle 
 _geom_angle_site_symmetry_1 
 _geom_angle_site_symmetry_3 
 _geom_angle_publ_flag 
C1 N1 H1 121.7(14) . . ? 
C1 N1 H2 123.6(15) . . ? 
H1 N1 H2 113.8(19) . . ? 
C2 N2 C1 121.12(13) . . ? 
N4 N3 C3 112.08(12) . . ? 
N4 N3 C2 120.27(12) . . ? 
C3 N3 C2 127.56(13) . . ? 
C5 N4 N3 103.86(12) . . ? 
C1 N5 H3 120.8(15) . . ? 
C1 N5 H4 117.7(15) . . ? 
H3 N5 H4 121(2) . . ? 
C2 N6 H5 121.1(13) . . ? 
C2 N6 H6 119.5(15) . . ? 
H5 N6 H6 116(2) . . ? 
N1 C1 N5 120.37(15) . . ? 
N1 C1 N2 117.89(15) . . ? 
N5 C1 N2 121.55(15) . . ? 
N2 C2 N6 129.14(14) . . ? 
N2 C2 N3 115.75(13) . . ? 
N6 C2 N3 115.08(13) . . ? 
C4 C3 N3 106.55(14) . . ? 
C4 C3 H7 133.0(11) . . ? 
N3 C3 H7 120.5(11) . . ? 
C3 C4 C5 105.20(14) . . ? 
C3 C4 H8 128.7(11) . . ? 
C5 C4 H8 126.1(11) . . ? 
N4 C5 C4 112.30(14) . . ? 
N4 C5 H9 119.9(11) . . ? 
C4 C5 H9 127.8(11) . . ? 
H10 O1 H11 110(3) . . ? 
 
loop_ 
 _geom_torsion_atom_site_label_1 
 _geom_torsion_atom_site_label_2 
 _geom_torsion_atom_site_label_3 
 _geom_torsion_atom_site_label_4 
 _geom_torsion 
 _geom_torsion_site_symmetry_1 
 _geom_torsion_site_symmetry_2 
 _geom_torsion_site_symmetry_3 
 _geom_torsion_site_symmetry_4 
 _geom_torsion_publ_flag 
C3 N3 N4 C5 0.84(17) . . . . ? 
C2 N3 N4 C5 177.66(12) . . . . ? 
C2 N2 C1 N1 -134.36(17) . . . . ? 
C2 N2 C1 N5 50.5(2) . . . . ? 
C1 N2 C2 N6 15.2(3) . . . . ? 
C1 N2 C2 N3 -167.11(14) . . . . ? 
N4 N3 C2 N2 -171.56(13) . . . . ? 
C3 N3 C2 N2 4.7(2) . . . . ? 
N4 N3 C2 N6 6.47(19) . . . . ? 
C3 N3 C2 N6 -177.25(14) . . . . ? 
N4 N3 C3 C4 -0.69(18) . . . . ? 
C2 N3 C3 C4 -177.23(14) . . . . ? 
N3 C3 C4 C5 0.25(18) . . . . ? 
N3 N4 C5 C4 -0.67(18) . . . . ? 
C3 C4 C5 N4 0.3(2) . . . . ? 
 
loop_ 
 _geom_hbond_atom_site_label_D 
 _geom_hbond_atom_site_label_H 
 _geom_hbond_atom_site_label_A 
 _geom_hbond_distance_DH 
 _geom_hbond_distance_HA 
 _geom_hbond_distance_DA 
 _geom_hbond_angle_DHA 
 _geom_hbond_site_symmetry_A 
N1 H1 Cl1  0.90(2) 2.47(2) 3.3411(17) 164.4(19) 4_576 
N1 H2 Cl1  0.83(2) 2.41(3) 3.2402(16) 173(2) 3_766 
N5 H3 O1  0.82(2) 2.24(2) 3.045(2) 167(2) 3_766 
N5 H4 O1  0.85(2) 2.04(2) 2.865(2) 165(2) 1_545 
N6 H5 N4  0.83(2) 2.41(2) 3.1201(18) 144.5(18) 3_656 
N6 H6 Cl1  0.81(2) 2.46(2) 3.2477(15) 166.0(19) 4_566 
O1 H10 Cl1  0.86(3) 2.31(3) 3.1306(15) 161(2) . 
O1 H11 Cl1  0.86(3) 2.33(3) 3.1856(16) 170(3) 1_565 
 
_diffrn_measured_fraction_theta_max    0.998 
_diffrn_reflns_theta_full              27.53 
_diffrn_measured_fraction_theta_full   0.998 
_refine_diff_density_max    0.364 
_refine_diff_density_min   -0.608 
_refine_diff_density_rms    0.160 

#===END

 
data_[1]
 
_audit_creation_method            SHELXL-97 
_chemical_name_systematic 
; 
 ? 
; 
_chemical_name_common             ? 
_chemical_melting_point           ? 
_chemical_formula_moiety          ? 
_chemical_formula_sum 
 'C28 H58 Cl2 Mn4 N24 O10' 
_chemical_formula_weight          1181.64 
 
loop_ 
 _atom_type_symbol 
 _atom_type_description 
 _atom_type_scat_dispersion_real 
 _atom_type_scat_dispersion_imag 
 _atom_type_scat_source 
 'C'  'C'   0.0033   0.0016 
 'International Tables Vol C Tables 4.2.6.8 and 6.1.1.4' 
 'H'  'H'   0.0000   0.0000 
 'International Tables Vol C Tables 4.2.6.8 and 6.1.1.4' 
 'N'  'N'   0.0061   0.0033 
 'International Tables Vol C Tables 4.2.6.8 and 6.1.1.4' 
 'O'  'O'   0.0106   0.0060 
 'International Tables Vol C Tables 4.2.6.8 and 6.1.1.4' 
 'Cl'  'Cl'   0.1484   0.1585 
 'International Tables Vol C Tables 4.2.6.8 and 6.1.1.4' 
 'Mn'  'Mn'   0.3368   0.7283 
 'International Tables Vol C Tables 4.2.6.8 and 6.1.1.4' 
 
_symmetry_cell_setting            Monoclinic
_symmetry_space_group_name_H-M    P21/n
 
loop_ 
 _symmetry_equiv_pos_as_xyz 
 'x, y, z' 
 '-x+1/2, y+1/2, -z+1/2' 
 '-x, -y, -z' 
 'x-1/2, -y-1/2, z-1/2' 
 
_cell_length_a                    10.5683(12) 
_cell_length_b                    21.205(2) 
_cell_length_c                    11.5868(13) 
_cell_angle_alpha                 90.00 
_cell_angle_beta                  104.614(3) 
_cell_angle_gamma                 90.00 
_cell_volume                      2512.6(5) 
_cell_formula_units_Z             2 
_cell_measurement_temperature     223(2) 
_cell_measurement_reflns_used     1020 
_cell_measurement_theta_min       1.92 
_cell_measurement_theta_max       27.59
 
_exptl_crystal_description        plate 
_exptl_crystal_colour             'dark orange'
_exptl_crystal_size_max           0.4
_exptl_crystal_size_mid           0.2
_exptl_crystal_size_min           0.03
_exptl_crystal_density_meas       ? 
_exptl_crystal_density_diffrn     1.562 
_exptl_crystal_density_method     'not measured' 
_exptl_crystal_F_000              1216 
_exptl_absorpt_coefficient_mu     1.161 
_exptl_absorpt_correction_type    'multi scan' 
_exptl_absorpt_correction_T_min   0.736979 
_exptl_absorpt_correction_T_max   0.862074 
_exptl_absorpt_process_details    ? 
 
_exptl_special_details 
; 
 ? 
; 
 
_diffrn_ambient_temperature       223(2) 
_diffrn_radiation_wavelength      0.71073 
_diffrn_radiation_type            MoK\a 
_diffrn_radiation_source          'fine-focus sealed tube' 
_diffrn_radiation_monochromator   graphite 
_diffrn_measurement_device_type   'CCD area detector' 
_diffrn_measurement_method        'phi and omega scans' 
_diffrn_detector_area_resol_mean  ? 
_diffrn_standards_number          ? 
_diffrn_standards_interval_count  ? 
_diffrn_standards_interval_time   ? 
_diffrn_standards_decay_%         ? 
_diffrn_reflns_number             17989 
_diffrn_reflns_av_R_equivalents   0.0734 
_diffrn_reflns_av_sigmaI/netI     0.1464 
_diffrn_reflns_limit_h_min        -13 
_diffrn_reflns_limit_h_max        12 
_diffrn_reflns_limit_k_min        -27 
_diffrn_reflns_limit_k_max        25 
_diffrn_reflns_limit_l_min        -14 
_diffrn_reflns_limit_l_max        14 
_diffrn_reflns_theta_min          1.92 
_diffrn_reflns_theta_max          27.59 
_reflns_number_total              5783 
_reflns_number_gt                 2341 
_reflns_threshold_expression      >2sigma(I) 
 
_computing_data_collection        'Bruker SMART'  
_computing_cell_refinement        'Bruker SMART'  
_computing_data_reduction         'Bruker SHELXTL' 
_computing_structure_solution     'SIR97' 
_computing_structure_refinement   'SHELXL-97 (Sheldrick, 1997)' 
_computing_molecular_graphics     ?  
_computing_publication_material   ? 
 
_refine_special_details 
; 
 Refinement of F^2^ against ALL reflections.  The weighted R-factor wR and 
 goodness of fit S are based on F^2^, conventional R-factors R are based 
 on F, with F set to zero for negative F^2^. The threshold expression of 
 F^2^ > 2sigma(F^2^) is used only for calculating R-factors(gt) etc. and is 
 not relevant to the choice of reflections for refinement.  R-factors based 
 on F^2^ are statistically about twice as large as those based on F, and R- 
 factors based on ALL data will be even larger. 
; 
 
_refine_ls_structure_factor_coef  Fsqd  
_refine_ls_matrix_type            full 
_refine_ls_weighting_scheme       calc  
_refine_ls_weighting_details 
 'calc w=1/[\s^2^(Fo^2^)+(0.1097P)^2^+0.0000P] where P=(Fo^2^+2Fc^2^)/3' 
_atom_sites_solution_primary      direct 
_atom_sites_solution_secondary    difmap 
_atom_sites_solution_hydrogens    geom 
_refine_ls_hydrogen_treatment     constr 
_refine_ls_extinction_method      none 
_refine_ls_extinction_coef        ? 
_refine_ls_number_reflns          5783 
_refine_ls_number_parameters      297 
_refine_ls_number_restraints      1 
_refine_ls_R_factor_all           0.1626 
_refine_ls_R_factor_gt            0.0680 
_refine_ls_wR_factor_ref          0.2073 
_refine_ls_wR_factor_gt           0.1776 
_refine_ls_goodness_of_fit_ref    0.853 
_refine_ls_restrained_S_all       0.853 
_refine_ls_shift/su_max           0.000 
_refine_ls_shift/su_mean          0.000 
 
loop_ 
 _atom_site_label 
 _atom_site_type_symbol 
 _atom_site_fract_x 
 _atom_site_fract_y 
 _atom_site_fract_z 
 _atom_site_U_iso_or_equiv 
 _atom_site_adp_type 
 _atom_site_occupancy 
 _atom_site_symetry_multiplicity 
 _atom_site_calc_flag 
 _atom_site_refinement_flags 
 _atom_site_disorder_assembly 
 _atom_site_disorder_group 
Mn1 Mn 1.03615(8) 0.06278(5) 0.43603(9) 0.0420(3) Uani 1 1 d . . . 
Mn2 Mn 0.83766(8) -0.03255(5) 0.28468(8) 0.0425(3) Uani 1 1 d . . . 
N1 N 1.3681(6) 0.0874(3) 0.3108(6) 0.078(2) Uani 1 1 d . . . 
H1 H 1.4067 0.0729 0.2592 0.093 Uiso 1 1 calc R . . 
H2 H 1.4047 0.1164 0.3597 0.093 Uiso 1 1 calc R . . 
N2 N 1.2031(5) 0.0204(3) 0.2363(5) 0.0524(15) Uani 1 1 d . . . 
N3 N 1.0429(5) -0.0479(3) 0.1467(5) 0.0516(15) Uani 1 1 d . . . 
N4 N 0.9260(5) -0.0768(3) 0.1417(5) 0.0573(16) Uani 1 1 d . . . 
N5 N 1.1955(5) 0.0885(3) 0.3965(5) 0.0549(15) Uani 1 1 d . . . 
H3 H 1.2361 0.1196 0.4373 0.066 Uiso 1 1 calc R . . 
N6 N 1.0025(4) 0.0131(2) 0.2941(5) 0.0430(13) Uani 1 1 d . . . 
C1 C 1.2514(6) 0.0648(4) 0.3148(7) 0.0530(18) Uani 1 1 d . . . 
C2 C 1.0853(6) -0.0007(3) 0.2334(6) 0.0473(17) Uani 1 1 d . . . 
C3 C 1.1013(7) -0.0716(5) 0.0670(7) 0.075(3) Uani 1 1 d . . . 
H4 H 1.1814 -0.0590 0.0553 0.090 Uiso 1 1 calc R . . 
C4 C 1.0238(8) -0.1167(5) 0.0070(8) 0.094(3) Uani 1 1 d . . . 
H5 H 1.0385 -0.1415 -0.0546 0.113 Uiso 1 1 calc R . . 
C5 C 0.9158(7) -0.1188(4) 0.0565(7) 0.073(2) Uani 1 1 d . . . 
H6 H 0.8458 -0.1464 0.0320 0.088 Uiso 1 1 calc R . . 
N7 N 0.4443(5) -0.0670(3) 0.2635(6) 0.0697(18) Uani 1 1 d . . . 
H7 H 0.4533 -0.1006 0.3064 0.084 Uiso 1 1 calc R . . 
H8 H 0.3682 -0.0504 0.2374 0.084 Uiso 1 1 calc R . . 
N8 N 0.5234(5) 0.0125(3) 0.1725(5) 0.0525(15) Uani 1 1 d . . . 
N9 N 0.5803(5) 0.0964(3) 0.0751(5) 0.0494(14) Uani 1 1 d . . . 
N10 N 0.6685(6) 0.1366(3) 0.0495(6) 0.0641(17) Uani 1 1 d . . . 
N11 N 0.6658(5) -0.0666(3) 0.2782(5) 0.0489(14) Uani 1 1 d . . . 
H9 H 0.6655 -0.1042 0.3058 0.059 Uiso 1 1 calc R . . 
N12 N 0.7456(4) 0.0335(3) 0.1827(5) 0.0513(14) Uani 1 1 d . . . 
H10 H 0.7942 0.0597 0.1569 0.062 Uiso 1 1 calc R . . 
C6 C 0.5480(6) -0.0407(4) 0.2375(6) 0.0484(17) Uani 1 1 d . . . 
C7 C 0.6192(6) 0.0442(3) 0.1471(5) 0.0429(16) Uani 1 1 d . . . 
C8 C 0.4553(7) 0.1157(4) 0.0225(7) 0.064(2) Uani 1 1 d . . . 
H11 H 0.3781 0.0956 0.0258 0.077 Uiso 1 1 calc R . . 
C9 C 0.4673(8) 0.1690(5) -0.0344(8) 0.081(3) Uani 1 1 d . . . 
H12 H 0.3997 0.1943 -0.0771 0.097 Uiso 1 1 calc R . . 
C10 C 0.5983(9) 0.1793(4) -0.0178(7) 0.076(2) Uani 1 1 d . . . 
H13 H 0.6331 0.2130 -0.0509 0.091 Uiso 1 1 calc R . . 
O1 O 0.8753(3) 0.02264(19) 0.4539(3) 0.0388(10) Uani 1 1 d . . . 
C11 C 0.7743(6) 0.0578(3) 0.4864(7) 0.0581(19) Uani 1 1 d . . . 
H14 H 0.8103 0.0800 0.5595 0.087 Uiso 1 1 calc R . . 
H15 H 0.7072 0.0296 0.4970 0.087 Uiso 1 1 calc R . . 
H16 H 0.7376 0.0875 0.4244 0.087 Uiso 1 1 calc R . . 
O2 O 1.0835(4) 0.0970(2) 0.5989(4) 0.0456(11) Uani 1 1 d . . . 
C12 C 1.0855(9) 0.1605(4) 0.6285(8) 0.088(3) Uani 1 1 d . . . 
H17 H 1.0095 0.1704 0.6561 0.132 Uiso 1 1 calc R . . 
H18 H 1.0857 0.1855 0.5595 0.132 Uiso 1 1 calc R . . 
H19 H 1.1628 0.1694 0.6904 0.132 Uiso 1 1 calc R . . 
O3 O 0.9321(5) 0.1506(3) 0.3598(5) 0.0769(16) Uani 1 1 d . . . 
C13 C 0.949(2) 0.1836(11) 0.270(2) 0.118(7) Uiso 0.50 1 d P A 1 
H20 H 1.0008 0.2202 0.2985 0.178 Uiso 0.50 1 calc PR A 1 
H21 H 0.8659 0.1964 0.2204 0.178 Uiso 0.50 1 calc PR A 1 
H22 H 0.9938 0.1583 0.2233 0.178 Uiso 0.50 1 calc PR A 1 
Cl1 Cl 0.9100(7) 0.3108(3) 0.0621(6) 0.114(2) Uiso 0.50 1 d P B 1 
Cl2 Cl 0.9605(7) 0.3234(3) 0.0438(6) 0.114(2) Uiso 0.50 1 d PD C 2 
O4 O 0.7282(9) 0.2160(4) 0.3988(8) 0.144(3) Uiso 1 1 d . . . 
C14 C 0.6164(13) 0.2060(6) 0.3130(11) 0.126(4) Uiso 1 1 d . . . 
O5 O 1.222(2) 0.2734(10) 0.1217(19) 0.181(8) Uiso 0.50 1 d P D 1 
C15 C 1.258(2) 0.2501(11) 0.225(2) 0.117(7) Uiso 0.50 1 d P D 1 
O6 O 1.0579(18) 0.2314(8) 0.2175(15) 0.160(6) Uiso 0.50 1 d PD E 2 
 
loop_ 
 _atom_site_aniso_label 
 _atom_site_aniso_U_11 
 _atom_site_aniso_U_22 
 _atom_site_aniso_U_33 
 _atom_site_aniso_U_23 
 _atom_site_aniso_U_13 
 _atom_site_aniso_U_12 
Mn1 0.0263(5) 0.0492(6) 0.0511(6) -0.0053(5) 0.0110(4) -0.0002(4) 
Mn2 0.0225(5) 0.0571(7) 0.0474(6) -0.0082(5) 0.0080(4) 0.0010(4) 
N1 0.049(4) 0.084(5) 0.112(5) -0.023(4) 0.043(4) -0.022(3) 
N2 0.028(3) 0.076(4) 0.054(3) -0.004(3) 0.013(3) -0.003(3) 
N3 0.031(3) 0.079(4) 0.047(3) -0.011(3) 0.013(2) 0.007(3) 
N4 0.033(3) 0.083(5) 0.055(4) -0.022(3) 0.009(3) 0.000(3) 
N5 0.039(3) 0.058(4) 0.069(4) -0.009(3) 0.015(3) -0.013(3) 
N6 0.024(3) 0.059(4) 0.047(3) -0.002(3) 0.011(2) 0.003(2) 
C1 0.033(3) 0.062(5) 0.068(5) 0.006(4) 0.020(3) 0.000(4) 
C2 0.033(3) 0.059(5) 0.052(4) 0.000(4) 0.014(3) 0.005(3) 
C3 0.043(4) 0.120(8) 0.066(5) -0.026(5) 0.024(4) 0.007(5) 
C4 0.060(6) 0.151(9) 0.075(6) -0.046(6) 0.024(5) 0.016(6) 
C5 0.043(4) 0.101(7) 0.069(5) -0.031(5) 0.000(4) 0.009(4) 
N7 0.030(3) 0.081(5) 0.100(5) 0.015(4) 0.018(3) -0.004(3) 
N8 0.025(3) 0.072(4) 0.058(4) 0.003(3) 0.005(3) 0.003(3) 
N9 0.038(3) 0.062(4) 0.049(3) -0.001(3) 0.012(3) 0.009(3) 
N10 0.052(4) 0.077(5) 0.069(4) 0.010(4) 0.026(3) 0.003(3) 
N11 0.028(3) 0.053(3) 0.061(4) 0.001(3) 0.005(2) 0.001(3) 
N12 0.024(3) 0.079(4) 0.051(3) 0.000(3) 0.009(2) -0.002(3) 
C6 0.029(3) 0.061(5) 0.053(4) -0.008(4) 0.007(3) -0.004(3) 
C7 0.035(3) 0.056(5) 0.040(4) -0.004(3) 0.012(3) 0.004(3) 
C8 0.047(4) 0.065(6) 0.071(5) 0.003(5) -0.001(4) 0.012(4) 
C9 0.061(6) 0.091(7) 0.084(6) 0.008(6) 0.005(5) 0.022(5) 
C10 0.092(7) 0.073(6) 0.064(5) 0.016(5) 0.022(5) 0.016(5) 
O1 0.023(2) 0.050(3) 0.044(2) -0.007(2) 0.0103(17) 0.0078(18) 
C11 0.043(4) 0.065(5) 0.070(5) -0.002(4) 0.021(3) 0.015(4) 
O2 0.036(2) 0.042(3) 0.057(3) -0.011(2) 0.008(2) 0.0010(19) 
C12 0.096(7) 0.069(6) 0.090(6) -0.018(5) 0.009(5) 0.013(5) 
O3 0.066(4) 0.066(4) 0.095(4) 0.022(3) 0.014(3) 0.010(3) 
 
_geom_special_details 
; 
 All esds (except the esd in the dihedral angle between two l.s. planes) 
 are estimated using the full covariance matrix.  The cell esds are taken 
 into account individually in the estimation of esds in distances, angles 
 and torsion angles; correlations between esds in cell parameters are only 
 used when they are defined by crystal symmetry.  An approximate (isotropic) 
 treatment of cell esds is used for estimating esds involving l.s. planes. 
; 
 
loop_ 
 _geom_bond_atom_site_label_1 
 _geom_bond_atom_site_label_2 
 _geom_bond_distance 
 _geom_bond_site_symmetry_2 
 _geom_bond_publ_flag 
Mn1 N6 1.910(5) . ? 
Mn1 N5 1.931(5) . ? 
Mn1 O1 1.958(4) . ? 
Mn1 O2 1.965(4) . ? 
Mn1 O3 2.229(5) . ? 
Mn1 O1 2.276(4) 3_756 ? 
Mn1 Mn2 3.1155(14) . ? 
Mn1 Mn1 3.231(2) 3_756 ? 
Mn1 Mn2 3.2379(14) 3_756 ? 
Mn2 N12 1.931(6) . ? 
Mn2 N11 1.939(5) . ? 
Mn2 O2 1.953(4) 3_756 ? 
Mn2 N6 1.972(5) . ? 
Mn2 O1 2.231(4) . ? 
Mn2 N4 2.297(6) . ? 
Mn2 Mn1 3.2379(14) 3_756 ? 
N1 C1 1.336(8) . ? 
N2 C2 1.316(7) . ? 
N2 C1 1.318(9) . ? 
N3 C3 1.332(8) . ? 
N3 N4 1.367(7) . ? 
N3 C2 1.408(8) . ? 
N4 C5 1.314(9) . ? 
N5 C1 1.335(8) . ? 
N6 C2 1.287(7) . ? 
C3 C4 1.335(12) . ? 
C4 C5 1.401(11) . ? 
N7 C6 1.330(8) . ? 
N8 C7 1.310(8) . ? 
N8 C6 1.345(9) . ? 
N9 N10 1.350(8) . ? 
N9 C8 1.370(8) . ? 
N9 C7 1.384(8) . ? 
N10 C10 1.298(9) . ? 
N11 C6 1.333(8) . ? 
N12 C7 1.314(7) . ? 
C8 C9 1.330(11) . ? 
C9 C10 1.366(11) . ? 
O1 C11 1.428(7) . ? 
O1 Mn1 2.276(4) 3_756 ? 
O2 C12 1.388(9) . ? 
O2 Mn2 1.953(4) 3_756 ? 
O3 C13 1.31(2) . ? 
O4 C14 1.356(13) . ? 
O5 C15 1.27(3) . ? 
 
loop_ 
 _geom_angle_atom_site_label_1 
 _geom_angle_atom_site_label_2 
 _geom_angle_atom_site_label_3 
 _geom_angle 
 _geom_angle_site_symmetry_1 
 _geom_angle_site_symmetry_3 
 _geom_angle_publ_flag 
N6 Mn1 N5 86.3(2) . . ? 
N6 Mn1 O1 82.72(19) . . ? 
N5 Mn1 O1 168.4(2) . . ? 
N6 Mn1 O2 167.9(2) . . ? 
N5 Mn1 O2 95.6(2) . . ? 
O1 Mn1 O2 94.38(17) . . ? 
N6 Mn1 O3 98.8(2) . . ? 
N5 Mn1 O3 92.4(2) . . ? 
O1 Mn1 O3 92.90(18) . . ? 
O2 Mn1 O3 93.0(2) . . ? 
N6 Mn1 O1 90.24(18) . 3_756 ? 
N5 Mn1 O1 95.6(2) . 3_756 ? 
O1 Mn1 O1 80.78(15) . 3_756 ? 
O2 Mn1 O1 77.68(16) . 3_756 ? 
O3 Mn1 O1 168.23(18) . 3_756 ? 
N6 Mn1 Mn2 37.30(14) . . ? 
N5 Mn1 Mn2 123.58(18) . . ? 
O1 Mn1 Mn2 45.44(11) . . ? 
O2 Mn1 Mn2 138.78(13) . . ? 
O3 Mn1 Mn2 97.14(15) . . ? 
O1 Mn1 Mn2 85.53(10) 3_756 . ? 
N6 Mn1 Mn1 85.76(16) . 3_756 ? 
N5 Mn1 Mn1 131.48(18) . 3_756 ? 
O1 Mn1 Mn1 44.05(12) . 3_756 ? 
O2 Mn1 Mn1 84.03(14) . 3_756 ? 
O3 Mn1 Mn1 136.07(15) . 3_756 ? 
O1 Mn1 Mn1 36.73(9) 3_756 3_756 ? 
Mn2 Mn1 Mn1 61.32(3) . 3_756 ? 
N6 Mn1 Mn2 133.76(16) . 3_756 ? 
N5 Mn1 Mn2 97.41(17) . 3_756 ? 
O1 Mn1 Mn2 87.58(12) . 3_756 ? 
O2 Mn1 Mn2 34.14(13) . 3_756 ? 
O3 Mn1 Mn2 126.81(15) . 3_756 ? 
O1 Mn1 Mn2 43.54(10) 3_756 3_756 ? 
Mn2 Mn1 Mn2 118.89(4) . 3_756 ? 
Mn1 Mn1 Mn2 57.58(3) 3_756 3_756 ? 
N12 Mn2 N11 85.6(2) . . ? 
N12 Mn2 O2 172.8(2) . 3_756 ? 
N11 Mn2 O2 89.9(2) . 3_756 ? 
N12 Mn2 N6 88.8(2) . . ? 
N11 Mn2 N6 172.4(2) . . ? 
O2 Mn2 N6 95.06(19) 3_756 . ? 
N12 Mn2 O1 96.18(19) . . ? 
N11 Mn2 O1 100.80(19) . . ? 
O2 Mn2 O1 79.03(16) 3_756 . ? 
N6 Mn2 O1 74.62(18) . . ? 
N12 Mn2 N4 95.1(2) . . ? 
N11 Mn2 N4 111.5(2) . . ? 
O2 Mn2 N4 91.8(2) 3_756 . ? 
N6 Mn2 N4 74.1(2) . . ? 
O1 Mn2 N4 146.42(17) . . ? 
N12 Mn2 Mn1 92.14(16) . . ? 
N11 Mn2 Mn1 139.02(16) . . ? 
O2 Mn2 Mn1 87.48(12) 3_756 . ? 
N6 Mn2 Mn1 35.94(15) . . ? 
O1 Mn2 Mn1 38.69(10) . . ? 
N4 Mn2 Mn1 109.44(14) . . ? 
N12 Mn2 Mn1 140.57(16) . 3_756 ? 
N11 Mn2 Mn1 96.36(16) . 3_756 ? 
O2 Mn2 Mn1 34.40(12) 3_756 3_756 ? 
N6 Mn2 Mn1 84.64(15) . 3_756 ? 
O1 Mn2 Mn1 44.64(11) . 3_756 ? 
N4 Mn2 Mn1 119.99(15) . 3_756 ? 
Mn1 Mn2 Mn1 61.11(4) . 3_756 ? 
C2 N2 C1 117.4(6) . . ? 
C3 N3 N4 111.9(6) . . ? 
C3 N3 C2 130.0(6) . . ? 
N4 N3 C2 118.1(5) . . ? 
C5 N4 N3 103.8(6) . . ? 
C5 N4 Mn2 148.0(5) . . ? 
N3 N4 Mn2 108.2(4) . . ? 
C1 N5 Mn1 129.1(5) . . ? 
C2 N6 Mn1 126.3(5) . . ? 
C2 N6 Mn2 124.8(5) . . ? 
Mn1 N6 Mn2 106.8(2) . . ? 
N2 C1 N5 126.5(6) . . ? 
N2 C1 N1 115.6(6) . . ? 
N5 C1 N1 117.9(7) . . ? 
N6 C2 N2 132.7(7) . . ? 
N6 C2 N3 114.4(6) . . ? 
N2 C2 N3 112.9(6) . . ? 
N3 C3 C4 107.5(7) . . ? 
C3 C4 C5 105.5(7) . . ? 
N4 C5 C4 111.4(8) . . ? 
C7 N8 C6 120.4(6) . . ? 
N10 N9 C8 110.8(6) . . ? 
N10 N9 C7 121.4(5) . . ? 
C8 N9 C7 127.8(6) . . ? 
C10 N10 N9 104.5(7) . . ? 
C6 N11 Mn2 130.0(5) . . ? 
C7 N12 Mn2 129.2(5) . . ? 
N7 C6 N11 119.8(7) . . ? 
N7 C6 N8 115.1(6) . . ? 
N11 C6 N8 125.0(6) . . ? 
N8 C7 N12 128.5(6) . . ? 
N8 C7 N9 114.7(6) . . ? 
N12 C7 N9 116.8(6) . . ? 
C9 C8 N9 105.8(7) . . ? 
C8 C9 C10 106.6(8) . . ? 
N10 C10 C9 112.3(8) . . ? 
C11 O1 Mn1 121.8(4) . . ? 
C11 O1 Mn2 121.7(4) . . ? 
Mn1 O1 Mn2 95.87(15) . . ? 
C11 O1 Mn1 119.8(4) . 3_756 ? 
Mn1 O1 Mn1 99.22(15) . 3_756 ? 
Mn2 O1 Mn1 91.83(15) . 3_756 ? 
C12 O2 Mn2 122.1(5) . 3_756 ? 
C12 O2 Mn1 125.4(5) . . ? 
Mn2 O2 Mn1 111.5(2) 3_756 . ? 
C13 O3 Mn1 127.5(11) . . ? 
 
loop_ 
 _geom_torsion_atom_site_label_1 
 _geom_torsion_atom_site_label_2 
 _geom_torsion_atom_site_label_3 
 _geom_torsion_atom_site_label_4 
 _geom_torsion 
 _geom_torsion_site_symmetry_1 
 _geom_torsion_site_symmetry_2 
 _geom_torsion_site_symmetry_3 
 _geom_torsion_site_symmetry_4 
 _geom_torsion_publ_flag 
N6 Mn1 Mn2 N12 -85.0(3) . . . . ? 
N5 Mn1 Mn2 N12 -87.6(3) . . . . ? 
O1 Mn1 Mn2 N12 97.2(2) . . . . ? 
O2 Mn1 Mn2 N12 113.1(2) . . . . ? 
O3 Mn1 Mn2 N12 10.2(2) . . . . ? 
O1 Mn1 Mn2 N12 178.68(17) 3_756 . . . ? 
Mn1 Mn1 Mn2 N12 149.56(15) 3_756 . . . ? 
Mn2 Mn1 Mn2 N12 149.56(15) 3_756 . . . ? 
N6 Mn1 Mn2 N11 -170.8(4) . . . . ? 
N5 Mn1 Mn2 N11 -173.4(3) . . . . ? 
O1 Mn1 Mn2 N11 11.4(3) . . . . ? 
O2 Mn1 Mn2 N11 27.3(3) . . . . ? 
O3 Mn1 Mn2 N11 -75.6(3) . . . . ? 
O1 Mn1 Mn2 N11 92.9(3) 3_756 . . . ? 
Mn1 Mn1 Mn2 N11 63.8(3) 3_756 . . . ? 
Mn2 Mn1 Mn2 N11 63.8(3) 3_756 . . . ? 
N6 Mn1 Mn2 O2 102.2(3) . . . 3_756 ? 
N5 Mn1 Mn2 O2 99.7(2) . . . 3_756 ? 
O1 Mn1 Mn2 O2 -75.5(2) . . . 3_756 ? 
O2 Mn1 Mn2 O2 -59.6(3) . . . 3_756 ? 
O3 Mn1 Mn2 O2 -162.58(19) . . . 3_756 ? 
O1 Mn1 Mn2 O2 5.90(15) 3_756 . . 3_756 ? 
Mn1 Mn1 Mn2 O2 -23.21(13) 3_756 . . 3_756 ? 
Mn2 Mn1 Mn2 O2 -23.21(13) 3_756 . . 3_756 ? 
N5 Mn1 Mn2 N6 -2.5(3) . . . . ? 
O1 Mn1 Mn2 N6 -177.7(3) . . . . ? 
O2 Mn1 Mn2 N6 -161.8(3) . . . . ? 
O3 Mn1 Mn2 N6 95.2(3) . . . . ? 
O1 Mn1 Mn2 N6 -96.3(3) 3_756 . . . ? 
Mn1 Mn1 Mn2 N6 -125.4(3) 3_756 . . . ? 
Mn2 Mn1 Mn2 N6 -125.4(3) 3_756 . . . ? 
N6 Mn1 Mn2 O1 177.7(3) . . . . ? 
N5 Mn1 Mn2 O1 175.2(3) . . . . ? 
O2 Mn1 Mn2 O1 15.9(3) . . . . ? 
O3 Mn1 Mn2 O1 -87.0(2) . . . . ? 
O1 Mn1 Mn2 O1 81.45(19) 3_756 . . . ? 
Mn1 Mn1 Mn2 O1 52.33(16) 3_756 . . . ? 
Mn2 Mn1 Mn2 O1 52.33(16) 3_756 . . . ? 
N6 Mn1 Mn2 N4 11.1(3) . . . . ? 
N5 Mn1 Mn2 N4 8.6(3) . . . . ? 
O1 Mn1 Mn2 N4 -166.6(2) . . . . ? 
O2 Mn1 Mn2 N4 -150.7(3) . . . . ? 
O3 Mn1 Mn2 N4 106.4(2) . . . . ? 
O1 Mn1 Mn2 N4 -85.13(19) 3_756 . . . ? 
Mn1 Mn1 Mn2 N4 -114.25(17) 3_756 . . . ? 
Mn2 Mn1 Mn2 N4 -114.25(17) 3_756 . . . ? 
N6 Mn1 Mn2 Mn1 125.4(3) . . . 3_756 ? 
N5 Mn1 Mn2 Mn1 122.9(2) . . . 3_756 ? 
O1 Mn1 Mn2 Mn1 -52.33(16) . . . 3_756 ? 
O2 Mn1 Mn2 Mn1 -36.42(19) . . . 3_756 ? 
O3 Mn1 Mn2 Mn1 -139.36(16) . . . 3_756 ? 
O1 Mn1 Mn2 Mn1 29.12(9) 3_756 . . 3_756 ? 
Mn2 Mn1 Mn2 Mn1 0.0 3_756 . . 3_756 ? 
C3 N3 N4 C5 0.1(8) . . . . ? 
C2 N3 N4 C5 -178.1(6) . . . . ? 
C3 N3 N4 Mn2 179.3(5) . . . . ? 
C2 N3 N4 Mn2 1.1(7) . . . . ? 
N12 Mn2 N4 C5 -92.5(10) . . . . ? 
N11 Mn2 N4 C5 -5.2(11) . . . . ? 
O2 Mn2 N4 C5 85.4(10) 3_756 . . . ? 
N6 Mn2 N4 C5 -179.8(10) . . . . ? 
O1 Mn2 N4 C5 158.2(9) . . . . ? 
Mn1 Mn2 N4 C5 173.4(10) . . . . ? 
Mn1 Mn2 N4 C5 106.2(10) 3_756 . . . ? 
N12 Mn2 N4 N3 89.0(4) . . . . ? 
N11 Mn2 N4 N3 176.3(4) . . . . ? 
O2 Mn2 N4 N3 -93.1(4) 3_756 . . . ? 
N6 Mn2 N4 N3 1.6(4) . . . . ? 
O1 Mn2 N4 N3 -20.3(6) . . . . ? 
Mn1 Mn2 N4 N3 -5.1(5) . . . . ? 
Mn1 Mn2 N4 N3 -72.3(4) 3_756 . . . ? 
N6 Mn1 N5 C1 -11.6(6) . . . . ? 
O1 Mn1 N5 C1 7.1(15) . . . . ? 
O2 Mn1 N5 C1 156.4(6) . . . . ? 
O3 Mn1 N5 C1 -110.3(6) . . . . ? 
O1 Mn1 N5 C1 78.3(6) 3_756 . . . ? 
Mn2 Mn1 N5 C1 -10.1(7) . . . . ? 
Mn1 Mn1 N5 C1 69.4(7) 3_756 . . . ? 
Mn2 Mn1 N5 C1 122.1(6) 3_756 . . . ? 
N5 Mn1 N6 C2 14.0(6) . . . . ? 
O1 Mn1 N6 C2 -162.3(6) . . . . ? 
O2 Mn1 N6 C2 -85.5(11) . . . . ? 
O3 Mn1 N6 C2 105.9(6) . . . . ? 
O1 Mn1 N6 C2 -81.6(6) 3_756 . . . ? 
Mn2 Mn1 N6 C2 -163.9(7) . . . . ? 
Mn1 Mn1 N6 C2 -118.1(6) 3_756 . . . ? 
Mn2 Mn1 N6 C2 -82.8(6) 3_756 . . . ? 
N5 Mn1 N6 Mn2 177.9(3) . . . . ? 
O1 Mn1 N6 Mn2 1.6(2) . . . . ? 
O2 Mn1 N6 Mn2 78.4(9) . . . . ? 
O3 Mn1 N6 Mn2 -90.2(2) . . . . ? 
O1 Mn1 N6 Mn2 82.3(2) 3_756 . . . ? 
Mn1 Mn1 N6 Mn2 45.8(2) 3_756 . . . ? 
Mn2 Mn1 N6 Mn2 81.2(2) 3_756 . . . ? 
N12 Mn2 N6 C2 -100.5(6) . . . . ? 
O2 Mn2 N6 C2 85.6(5) 3_756 . . . ? 
O1 Mn2 N6 C2 162.8(6) . . . . ? 
N4 Mn2 N6 C2 -4.8(5) . . . . ? 
Mn1 Mn2 N6 C2 164.2(7) . . . . ? 
Mn1 Mn2 N6 C2 118.4(5) 3_756 . . . ? 
N12 Mn2 N6 Mn1 95.3(3) . . . . ? 
O2 Mn2 N6 Mn1 -78.6(2) 3_756 . . . ? 
O1 Mn2 N6 Mn1 -1.5(2) . . . . ? 
N4 Mn2 N6 Mn1 -169.1(3) . . . . ? 
Mn1 Mn2 N6 Mn1 -45.8(2) 3_756 . . . ? 
C2 N2 C1 N5 3.7(11) . . . . ? 
C2 N2 C1 N1 -176.6(6) . . . . ? 
Mn1 N5 C1 N2 5.2(11) . . . . ? 
Mn1 N5 C1 N1 -174.6(5) . . . . ? 
Mn1 N6 C2 N2 -11.6(11) . . . . ? 
Mn2 N6 C2 N2 -172.8(6) . . . . ? 
Mn1 N6 C2 N3 168.1(4) . . . . ? 
Mn2 N6 C2 N3 6.9(8) . . . . ? 
C1 N2 C2 N6 -0.3(12) . . . . ? 
C1 N2 C2 N3 180.0(6) . . . . ? 
C3 N3 C2 N6 177.4(7) . . . . ? 
N4 N3 C2 N6 -4.7(9) . . . . ? 
C3 N3 C2 N2 -2.8(11) . . . . ? 
N4 N3 C2 N2 175.1(6) . . . . ? 
N4 N3 C3 C4 0.2(10) . . . . ? 
C2 N3 C3 C4 178.2(7) . . . . ? 
N3 C3 C4 C5 -0.4(10) . . . . ? 
N3 N4 C5 C4 -0.3(9) . . . . ? 
Mn2 N4 C5 C4 -178.9(8) . . . . ? 
C3 C4 C5 N4 0.5(11) . . . . ? 
C8 N9 N10 C10 -0.2(8) . . . . ? 
C7 N9 N10 C10 -179.4(6) . . . . ? 
N12 Mn2 N11 C6 -11.7(6) . . . . ? 
O2 Mn2 N11 C6 162.6(6) 3_756 . . . ? 
O1 Mn2 N11 C6 83.7(6) . . . . ? 
N4 Mn2 N11 C6 -105.5(6) . . . . ? 
Mn1 Mn2 N11 C6 76.5(6) . . . . ? 
Mn1 Mn2 N11 C6 128.7(6) 3_756 . . . ? 
N11 Mn2 N12 C7 6.0(6) . . . . ? 
N6 Mn2 N12 C7 -168.8(6) . . . . ? 
O1 Mn2 N12 C7 -94.4(6) . . . . ? 
N4 Mn2 N12 C7 117.3(6) . . . . ? 
Mn1 Mn2 N12 C7 -133.0(5) . . . . ? 
Mn1 Mn2 N12 C7 -88.7(6) 3_756 . . . ? 
Mn2 N11 C6 N7 -166.1(5) . . . . ? 
Mn2 N11 C6 N8 12.0(10) . . . . ? 
C7 N8 C6 N7 176.3(6) . . . . ? 
C7 N8 C6 N11 -2.0(10) . . . . ? 
C6 N8 C7 N12 -4.2(11) . . . . ? 
C6 N8 C7 N9 177.2(6) . . . . ? 
Mn2 N12 C7 N8 0.2(10) . . . . ? 
Mn2 N12 C7 N9 178.8(4) . . . . ? 
N10 N9 C7 N8 174.5(6) . . . . ? 
C8 N9 C7 N8 -4.5(9) . . . . ? 
N10 N9 C7 N12 -4.3(9) . . . . ? 
C8 N9 C7 N12 176.7(6) . . . . ? 
N10 N9 C8 C9 -1.1(8) . . . . ? 
C7 N9 C8 C9 178.0(7) . . . . ? 
N9 C8 C9 C10 1.9(9) . . . . ? 
N9 N10 C10 C9 1.5(9) . . . . ? 
C8 C9 C10 N10 -2.2(11) . . . . ? 
N6 Mn1 O1 C11 -134.7(5) . . . . ? 
N5 Mn1 O1 C11 -153.5(10) . . . . ? 
O2 Mn1 O1 C11 57.1(5) . . . . ? 
O3 Mn1 O1 C11 -36.1(5) . . . . ? 
O1 Mn1 O1 C11 133.9(5) 3_756 . . . ? 
Mn2 Mn1 O1 C11 -133.3(5) . . . . ? 
Mn1 Mn1 O1 C11 133.9(5) 3_756 . . . ? 
Mn2 Mn1 O1 C11 90.6(4) 3_756 . . . ? 
N6 Mn1 O1 Mn2 -1.39(19) . . . . ? 
N5 Mn1 O1 Mn2 -20.2(11) . . . . ? 
O2 Mn1 O1 Mn2 -169.56(17) . . . . ? 
O3 Mn1 O1 Mn2 97.17(19) . . . . ? 
O1 Mn1 O1 Mn2 -92.82(17) 3_756 . . . ? 
Mn1 Mn1 O1 Mn2 -92.82(17) 3_756 . . . ? 
Mn2 Mn1 O1 Mn2 -136.08(12) 3_756 . . . ? 
N6 Mn1 O1 Mn1 91.43(19) . . . 3_756 ? 
N5 Mn1 O1 Mn1 72.6(11) . . . 3_756 ? 
O2 Mn1 O1 Mn1 -76.75(17) . . . 3_756 ? 
O3 Mn1 O1 Mn1 -170.01(19) . . . 3_756 ? 
O1 Mn1 O1 Mn1 0.0 3_756 . . 3_756 ? 
Mn2 Mn1 O1 Mn1 92.82(17) . . . 3_756 ? 
Mn2 Mn1 O1 Mn1 -43.26(11) 3_756 . . 3_756 ? 
N12 Mn2 O1 C11 47.7(5) . . . . ? 
N11 Mn2 O1 C11 -39.0(5) . . . . ? 
O2 Mn2 O1 C11 -126.8(5) 3_756 . . . ? 
N6 Mn2 O1 C11 134.7(5) . . . . ? 
N4 Mn2 O1 C11 156.7(5) . . . . ? 
Mn1 Mn2 O1 C11 133.4(5) . . . . ? 
Mn1 Mn2 O1 C11 -127.2(5) 3_756 . . . ? 
N12 Mn2 O1 Mn1 -85.69(19) . . . . ? 
N11 Mn2 O1 Mn1 -172.4(2) . . . . ? 
O2 Mn2 O1 Mn1 99.80(18) 3_756 . . . ? 
N6 Mn2 O1 Mn1 1.38(19) . . . . ? 
N4 Mn2 O1 Mn1 23.3(4) . . . . ? 
Mn1 Mn2 O1 Mn1 99.47(16) 3_756 . . . ? 
N12 Mn2 O1 Mn1 174.85(17) . . . 3_756 ? 
N11 Mn2 O1 Mn1 88.13(19) . . . 3_756 ? 
O2 Mn2 O1 Mn1 0.34(15) 3_756 . . 3_756 ? 
N6 Mn2 O1 Mn1 -98.08(18) . . . 3_756 ? 
N4 Mn2 O1 Mn1 -76.2(4) . . . 3_756 ? 
Mn1 Mn2 O1 Mn1 -99.47(16) . . . 3_756 ? 
N6 Mn1 O2 C12 171.9(9) . . . . ? 
N5 Mn1 O2 C12 73.4(6) . . . . ? 
O1 Mn1 O2 C12 -112.5(6) . . . . ? 
O3 Mn1 O2 C12 -19.4(6) . . . . ? 
O1 Mn1 O2 C12 167.9(6) 3_756 . . . ? 
Mn2 Mn1 O2 C12 -123.8(5) . . . . ? 
Mn1 Mn1 O2 C12 -155.4(6) 3_756 . . . ? 
Mn2 Mn1 O2 C12 168.3(7) 3_756 . . . ? 
N6 Mn1 O2 Mn2 3.6(10) . . . 3_756 ? 
N5 Mn1 O2 Mn2 -94.9(3) . . . 3_756 ? 
O1 Mn1 O2 Mn2 79.1(2) . . . 3_756 ? 
O3 Mn1 O2 Mn2 172.3(2) . . . 3_756 ? 
O1 Mn1 O2 Mn2 -0.41(18) 3_756 . . 3_756 ? 
Mn2 Mn1 O2 Mn2 67.9(3) . . . 3_756 ? 
Mn1 Mn1 O2 Mn2 36.27(17) 3_756 . . 3_756 ? 
N6 Mn1 O3 C13 -54.6(13) . . . . ? 
N5 Mn1 O3 C13 32.1(13) . . . . ? 
O1 Mn1 O3 C13 -137.6(13) . . . . ? 
O2 Mn1 O3 C13 127.8(13) . . . . ? 
O1 Mn1 O3 C13 165.3(13) 3_756 . . . ? 
Mn2 Mn1 O3 C13 -92.2(13) . . . . ? 
Mn1 Mn1 O3 C13 -147.7(13) 3_756 . . . ? 
Mn2 Mn1 O3 C13 133.2(13) 3_756 . . . ? 
 
_diffrn_measured_fraction_theta_max    0.993 
_diffrn_reflns_theta_full              27.59 
_diffrn_measured_fraction_theta_full   0.993 
_refine_diff_density_max    0.961 
_refine_diff_density_min   -0.688 
_refine_diff_density_rms    0.112 


#===END


 
data_[2]
 
_audit_creation_method            SHELXL-97 
_chemical_name_systematic 
; 
 ? 
; 
_chemical_name_common             ? 
_chemical_melting_point           ? 
_chemical_formula_moiety          ? 
_chemical_formula_sum 
 'C32 H62 Mn6 N24 O20' 
_chemical_formula_weight          1432.70 
 
loop_ 
 _atom_type_symbol 
 _atom_type_description 
 _atom_type_scat_dispersion_real 
 _atom_type_scat_dispersion_imag 
 _atom_type_scat_source 
 'C'  'C'   0.0033   0.0016 
 'International Tables Vol C Tables 4.2.6.8 and 6.1.1.4' 
 'H'  'H'   0.0000   0.0000 
 'International Tables Vol C Tables 4.2.6.8 and 6.1.1.4' 
 'N'  'N'   0.0061   0.0033 
 'International Tables Vol C Tables 4.2.6.8 and 6.1.1.4' 
 'O'  'O'   0.0106   0.0060 
 'International Tables Vol C Tables 4.2.6.8 and 6.1.1.4' 
 'Mn'  'Mn'   0.3368   0.7283 
 'International Tables Vol C Tables 4.2.6.8 and 6.1.1.4' 
 
_symmetry_cell_setting            Monoclinic 
_symmetry_space_group_name_H-M    C2/m
 
loop_ 
 _symmetry_equiv_pos_as_xyz 
 'x, y, z' 
 '-x, y, -z' 
 'x+1/2, y+1/2, z' 
 '-x+1/2, y+1/2, -z' 
 '-x, -y, -z' 
 'x, -y, z' 
 '-x+1/2, -y+1/2, -z' 
 'x+1/2, -y+1/2, z' 
 
_cell_length_a                    12.348(2) 
_cell_length_b                    24.911(5) 
_cell_length_c                    9.7567(18) 
_cell_angle_alpha                 90.00 
_cell_angle_beta                  108.533(4) 
_cell_angle_gamma                 90.00 
_cell_volume                      2845.6(9) 
_cell_formula_units_Z             2 
_cell_measurement_temperature     223(2) 
_cell_measurement_reflns_used     788
_cell_measurement_theta_min       1.63 
_cell_measurement_theta_max       27.61
 
_exptl_crystal_description        plate 
_exptl_crystal_colour             'dark orange'
_exptl_crystal_size_max           0.2
_exptl_crystal_size_mid           0.07
_exptl_crystal_size_min           0.02
_exptl_crystal_density_meas       ? 
_exptl_crystal_density_diffrn     1.672 
_exptl_crystal_density_method     'not measured' 
_exptl_crystal_F_000              1464 
_exptl_absorpt_coefficient_mu     1.381 
_exptl_absorpt_correction_type    'multi scan' 
_exptl_absorpt_correction_T_min   0.761301 
_exptl_absorpt_correction_T_max   0.862075 
_exptl_absorpt_process_details    ? 
 
_exptl_special_details 
; 
 ? 
; 
 
_diffrn_ambient_temperature       223(2) 
_diffrn_radiation_wavelength      0.71073 
_diffrn_radiation_type            MoK\a 
_diffrn_radiation_source          'fine-focus sealed tube' 
_diffrn_radiation_monochromator   graphite 
_diffrn_measurement_device_type   'CCD area detector' 
_diffrn_measurement_method        'phi and omega scans' 
_diffrn_detector_area_resol_mean  ? 
_diffrn_standards_number          ? 
_diffrn_standards_interval_count  ? 
_diffrn_standards_interval_time   ? 
_diffrn_standards_decay_%         ? 
_diffrn_reflns_number             13793 
_diffrn_reflns_av_R_equivalents   0.0835 
_diffrn_reflns_av_sigmaI/netI     0.1191 
_diffrn_reflns_limit_h_min        -15 
_diffrn_reflns_limit_h_max        15 
_diffrn_reflns_limit_k_min        -32 
_diffrn_reflns_limit_k_max        32 
_diffrn_reflns_limit_l_min        -12 
_diffrn_reflns_limit_l_max        12 
_diffrn_reflns_theta_min          1.63 
_diffrn_reflns_theta_max          27.61 
_reflns_number_total              3362 
_reflns_number_gt                 1880 
_reflns_threshold_expression      >2sigma(I) 
 
_computing_data_collection        'Bruker SMART' 
_computing_cell_refinement        'Bruker SMART' 
_computing_data_reduction         'Bruker SHELXTL'
_computing_structure_solution     'SHELXS-97 (Sheldrick, 1990)' 
_computing_structure_refinement   'SHELXL-97 (Sheldrick, 1997)' 
_computing_molecular_graphics     ? 
_computing_publication_material   ? 
 
_refine_special_details 
; 
 Refinement of F^2^ against ALL reflections.  The weighted R-factor wR and 
 goodness of fit S are based on F^2^, conventional R-factors R are based 
 on F, with F set to zero for negative F^2^. The threshold expression of 
 F^2^ > 2sigma(F^2^) is used only for calculating R-factors(gt) etc. and is 
 not relevant to the choice of reflections for refinement.  R-factors based 
 on F^2^ are statistically about twice as large as those based on F, and R- 
 factors based on ALL data will be even larger. 
; 
 
_refine_ls_structure_factor_coef  Fsqd  
_refine_ls_matrix_type            full 
_refine_ls_weighting_scheme       calc  
_refine_ls_weighting_details 
 'calc w=1/[\s^2^(Fo^2^)+(0.0601P)^2^+0.0000P] where P=(Fo^2^+2Fc^2^)/3' 
_atom_sites_solution_primary      direct 
_atom_sites_solution_secondary    difmap 
_atom_sites_solution_hydrogens    geom 
_refine_ls_hydrogen_treatment     constr 
_refine_ls_extinction_method      none 
_refine_ls_extinction_coef        ? 
_refine_ls_number_reflns          3362 
_refine_ls_number_parameters      201 
_refine_ls_number_restraints      0 
_refine_ls_R_factor_all           0.1332 
_refine_ls_R_factor_gt            0.0637 
_refine_ls_wR_factor_ref          0.1384 
_refine_ls_wR_factor_gt           0.1186 
_refine_ls_goodness_of_fit_ref    0.934 
_refine_ls_restrained_S_all       0.934 
_refine_ls_shift/su_max           0.000 
_refine_ls_shift/su_mean          0.000 
 
loop_ 
 _atom_site_label 
 _atom_site_type_symbol 
 _atom_site_fract_x 
 _atom_site_fract_y 
 _atom_site_fract_z 
 _atom_site_U_iso_or_equiv 
 _atom_site_adp_type 
 _atom_site_occupancy 
 _atom_site_symetry_multiplicity 
 _atom_site_calc_flag 
 _atom_site_refinement_flags 
 _atom_site_disorder_assembly 
 _atom_site_disorder_group 
Mn1 Mn 0.11302(6) 0.06509(3) 0.40588(8) 0.0262(2) Uani 1 1 d . . . 
Mn2 Mn 0.08874(8) 0.0000 0.67044(11) 0.0239(3) Uani 1 2 d S . . 
N1 N 0.4161(4) 0.0969(2) 0.3171(6) 0.0606(16) Uani 1 1 d . . . 
H1 H 0.4094 0.0736 0.2484 0.073 Uiso 1 1 calc R . . 
H2 H 0.4771 0.1167 0.3475 0.073 Uiso 1 1 calc R . . 
N2 N 0.3524(4) 0.13933(19) 0.4817(5) 0.0430(12) Uani 1 1 d . . . 
N3 N 0.2999(4) 0.19575(18) 0.6331(5) 0.0466(13) Uani 1 1 d . . . 
N4 N 0.2259(5) 0.2120(2) 0.7043(7) 0.0681(17) Uani 1 1 d . . . 
N5 N 0.2398(3) 0.07222(17) 0.3299(5) 0.0320(10) Uani 1 1 d . . . 
H3 H 0.2349 0.0527 0.2542 0.038 Uiso 1 1 calc R . . 
N6 N 0.1758(3) 0.12720(15) 0.5255(5) 0.0320(10) Uani 1 1 d . . . 
H4 H 0.1346 0.1405 0.5748 0.038 Uiso 1 1 calc R . . 
C1 C 0.3321(4) 0.1023(2) 0.3762(6) 0.0361(13) Uani 1 1 d . . . 
C2 C 0.2733(5) 0.1512(2) 0.5400(6) 0.0361(13) Uani 1 1 d . . . 
C3 C 0.3891(6) 0.2307(3) 0.6572(8) 0.067(2) Uani 1 1 d . . . 
H5 H 0.4496 0.2282 0.6185 0.081 Uiso 1 1 calc R . . 
C4 C 0.3747(8) 0.2694(3) 0.7468(8) 0.083(3) Uani 1 1 d . . . 
H6 H 0.4227 0.2988 0.7836 0.100 Uiso 1 1 calc R . . 
C5 C 0.2712(8) 0.2560(3) 0.7733(9) 0.089(3) Uani 1 1 d . . . 
H7 H 0.2393 0.2761 0.8325 0.107 Uiso 1 1 calc R . . 
O1 O -0.0087(3) 0.11145(14) 0.2349(4) 0.0456(11) Uani 1 1 d . . . 
O2 O -0.1601(3) 0.05751(15) 0.1789(4) 0.0416(10) Uani 1 1 d . . . 
C6 C -0.1068(5) 0.0987(2) 0.1578(6) 0.0392(14) Uani 1 1 d . . . 
C7 C -0.1633(5) 0.1335(2) 0.0310(7) 0.0528(17) Uani 1 1 d . . . 
H8 H -0.1405 0.1705 0.0545 0.079 Uiso 1 1 calc R . . 
H9 H -0.2456 0.1306 0.0071 0.079 Uiso 1 1 calc R . . 
H10 H -0.1408 0.1222 -0.0511 0.079 Uiso 1 1 calc R . . 
O3 O 0.2042(3) 0.0000 0.5797(5) 0.0244(11) Uani 1 2 d S . . 
C8 C 0.3225(6) 0.0000 0.6582(9) 0.043(2) Uani 1 2 d S . . 
H11 H 0.3662 0.0000 0.5913 0.064 Uiso 1 2 calc SR . . 
H12 H 0.3412 -0.0318 0.7186 0.064 Uiso 0.50 1 calc PR . . 
H13 H 0.3412 0.0318 0.7186 0.064 Uiso 0.50 1 calc PR . . 
O4 O 0.0563(4) 0.0000 0.2980(5) 0.0230(10) Uani 1 2 d S . . 
O5 O 0.0000 0.05395(18) 0.5000 0.0400(14) Uani 1 2 d S . . 
O6 O 0.475(4) 0.0731(8) 0.035(3) 0.225(17) Uani 0.50 1 d P . . 
C9 C 0.5000 0.1294(8) 0.0000 0.173(8) Uani 1 2 d S . . 
O7 O 0.3322(9) 0.0000 0.0857(10) 0.153(4) Uani 1 2 d S . . 
O8 O 0.0845(15) 0.0000 0.044(2) 0.278(10) Uani 1 2 d S . . 
 
loop_ 
 _atom_site_aniso_label 
 _atom_site_aniso_U_11 
 _atom_site_aniso_U_22 
 _atom_site_aniso_U_33 
 _atom_site_aniso_U_23 
 _atom_site_aniso_U_13 
 _atom_site_aniso_U_12 
Mn1 0.0234(4) 0.0180(4) 0.0382(5) -0.0008(3) 0.0112(3) -0.0031(3) 
Mn2 0.0196(5) 0.0214(6) 0.0283(6) 0.000 0.0043(5) 0.000 
N1 0.026(3) 0.082(4) 0.079(4) -0.025(3) 0.024(3) -0.019(3) 
N2 0.027(2) 0.044(3) 0.056(3) -0.013(2) 0.012(2) -0.012(2) 
N3 0.053(3) 0.031(3) 0.056(3) -0.011(2) 0.018(3) -0.019(2) 
N4 0.087(4) 0.045(3) 0.079(4) -0.026(3) 0.035(4) -0.021(3) 
N5 0.031(2) 0.031(3) 0.037(3) -0.005(2) 0.016(2) -0.007(2) 
N6 0.031(2) 0.022(2) 0.047(3) -0.005(2) 0.018(2) -0.0056(18) 
C1 0.024(3) 0.042(3) 0.042(3) 0.003(3) 0.009(2) -0.001(2) 
C2 0.037(3) 0.021(3) 0.044(4) 0.002(2) 0.004(3) -0.007(2) 
C3 0.070(5) 0.059(5) 0.070(5) -0.010(4) 0.017(4) -0.036(4) 
C4 0.125(7) 0.050(5) 0.071(5) -0.020(4) 0.026(5) -0.047(5) 
C5 0.124(8) 0.048(5) 0.103(7) -0.040(5) 0.046(6) -0.034(5) 
O1 0.033(2) 0.026(2) 0.065(3) 0.0115(18) -0.0029(19) -0.0019(17) 
O2 0.031(2) 0.037(2) 0.051(3) -0.0014(19) 0.0045(17) -0.0049(18) 
C6 0.035(3) 0.030(3) 0.048(4) -0.008(3) 0.007(3) 0.007(3) 
C7 0.051(4) 0.047(4) 0.051(4) 0.001(3) 0.003(3) 0.003(3) 
O3 0.018(2) 0.021(2) 0.033(3) 0.000 0.006(2) 0.000 
C8 0.022(4) 0.048(5) 0.050(6) 0.000 0.002(4) 0.000 
O4 0.028(2) 0.016(2) 0.026(3) 0.000 0.009(2) 0.000 
O5 0.047(3) 0.013(3) 0.075(4) 0.000 0.040(3) 0.000 
O6 0.39(5) 0.154(15) 0.11(2) 0.015(12) 0.05(2) 0.08(2) 
C9 0.192(19) 0.111(15) 0.24(2) 0.000 0.101(18) 0.000 
O7 0.154(9) 0.159(10) 0.096(8) 0.000 -0.030(7) 0.000 
O8 0.38(3) 0.260(17) 0.23(2) 0.000 0.16(2) 0.000 
 
_geom_special_details 
; 
 All esds (except the esd in the dihedral angle between two l.s. planes) 
 are estimated using the full covariance matrix.  The cell esds are taken 
 into account individually in the estimation of esds in distances, angles 
 and torsion angles; correlations between esds in cell parameters are only 
 used when they are defined by crystal symmetry.  An approximate (isotropic) 
 treatment of cell esds is used for estimating esds involving l.s. planes. 
; 
 
loop_ 
 _geom_bond_atom_site_label_1 
 _geom_bond_atom_site_label_2 
 _geom_bond_distance 
 _geom_bond_site_symmetry_2 
 _geom_bond_publ_flag 
Mn1 O5 1.9190(10) . ? 
Mn1 O4 1.939(2) . ? 
Mn1 N5 1.941(4) . ? 
Mn1 N6 1.944(4) . ? 
Mn1 O1 2.187(4) . ? 
Mn1 O3 2.358(3) . ? 
Mn1 Mn2 2.8655(11) 5_556 ? 
Mn1 Mn2 3.1423(13) . ? 
Mn2 O3 1.903(4) . ? 
Mn2 O4 1.911(4) 5_556 ? 
Mn2 O2 2.041(4) 2_556 ? 
Mn2 O2 2.041(4) 5_556 ? 
Mn2 O5 2.148(3) 5_556 ? 
Mn2 O5 2.148(3) . ? 
Mn2 Mn1 2.8655(11) 5_556 ? 
Mn2 Mn1 2.8655(11) 2_556 ? 
Mn2 Mn1 3.1423(13) 6 ? 
N1 C1 1.345(7) . ? 
N2 C2 1.311(7) . ? 
N2 C1 1.345(7) . ? 
N3 C3 1.364(7) . ? 
N3 N4 1.372(7) . ? 
N3 C2 1.405(7) . ? 
N4 C5 1.316(8) . ? 
N5 C1 1.318(6) . ? 
N6 C2 1.311(6) . ? 
C3 C4 1.351(10) . ? 
C4 C5 1.421(11) . ? 
O1 C6 1.247(6) . ? 
O2 C6 1.270(6) . ? 
O2 Mn2 2.041(4) 5_556 ? 
C6 C7 1.491(8) . ? 
O3 C8 1.418(7) . ? 
O3 Mn1 2.358(3) 6 ? 
O4 Mn2 1.911(4) 5_556 ? 
O4 Mn1 1.939(2) 6 ? 
O5 Mn1 1.9190(10) 2_556 ? 
O5 Mn2 2.148(3) 5_556 ? 
O6 O6 1.05(6) 2_655 ? 
O6 C9 1.50(2) . ? 
C9 O6 1.50(2) 2_655 ? 
 
loop_ 
 _geom_angle_atom_site_label_1 
 _geom_angle_atom_site_label_2 
 _geom_angle_atom_site_label_3 
 _geom_angle 
 _geom_angle_site_symmetry_1 
 _geom_angle_site_symmetry_3 
 _geom_angle_publ_flag 
O5 Mn1 O4 86.95(17) . . ? 
O5 Mn1 N5 173.33(14) . . ? 
O4 Mn1 N5 93.73(18) . . ? 
O5 Mn1 N6 92.28(17) . . ? 
O4 Mn1 N6 175.97(17) . . ? 
N5 Mn1 N6 86.58(18) . . ? 
O5 Mn1 O1 90.76(13) . . ? 
O4 Mn1 O1 89.15(15) . . ? 
N5 Mn1 O1 95.88(17) . . ? 
N6 Mn1 O1 94.82(16) . . ? 
O5 Mn1 O3 79.06(14) . . ? 
O4 Mn1 O3 79.80(13) . . ? 
N5 Mn1 O3 94.52(16) . . ? 
N6 Mn1 O3 96.16(14) . . ? 
O1 Mn1 O3 165.28(13) . . ? 
O5 Mn1 Mn2 48.55(9) . 5_556 ? 
O4 Mn1 Mn2 41.54(13) . 5_556 ? 
N5 Mn1 Mn2 133.82(13) . 5_556 ? 
N6 Mn1 Mn2 138.95(13) . 5_556 ? 
O1 Mn1 Mn2 76.73(10) . 5_556 ? 
O3 Mn1 Mn2 88.56(9) . 5_556 ? 
O5 Mn1 Mn2 42.14(8) . . ? 
O4 Mn1 Mn2 84.38(12) . . ? 
N5 Mn1 Mn2 131.30(13) . . ? 
N6 Mn1 Mn2 92.39(13) . . ? 
O1 Mn1 Mn2 132.62(11) . . ? 
O3 Mn1 Mn2 37.13(11) . . ? 
Mn2 Mn1 Mn2 67.63(4) 5_556 . ? 
O3 Mn2 O4 162.62(19) . 5_556 ? 
O3 Mn2 O2 96.85(15) . 2_556 ? 
O4 Mn2 O2 95.50(14) 5_556 2_556 ? 
O3 Mn2 O2 96.85(14) . 5_556 ? 
O4 Mn2 O2 95.50(14) 5_556 5_556 ? 
O2 Mn2 O2 89.2(2) 2_556 5_556 ? 
O3 Mn2 O5 85.02(11) . 5_556 ? 
O4 Mn2 O5 81.44(11) 5_556 5_556 ? 
O2 Mn2 O5 173.67(13) 2_556 5_556 ? 
O2 Mn2 O5 96.64(14) 5_556 5_556 ? 
O3 Mn2 O5 85.02(11) . . ? 
O4 Mn2 O5 81.44(11) 5_556 . ? 
O2 Mn2 O5 96.64(14) 2_556 . ? 
O2 Mn2 O5 173.67(13) 5_556 . ? 
O5 Mn2 O5 77.47(19) 5_556 . ? 
O3 Mn2 Mn1 126.69(10) . 5_556 ? 
O4 Mn2 Mn1 42.27(7) 5_556 5_556 ? 
O2 Mn2 Mn1 136.46(12) 2_556 5_556 ? 
O2 Mn2 Mn1 86.01(10) 5_556 5_556 ? 
O5 Mn2 Mn1 42.04(3) 5_556 5_556 ? 
O5 Mn2 Mn1 88.02(8) . 5_556 ? 
O3 Mn2 Mn1 126.69(10) . 2_556 ? 
O4 Mn2 Mn1 42.27(7) 5_556 2_556 ? 
O2 Mn2 Mn1 86.01(10) 2_556 2_556 ? 
O2 Mn2 Mn1 136.46(12) 5_556 2_556 ? 
O5 Mn2 Mn1 88.02(8) 5_556 2_556 ? 
O5 Mn2 Mn1 42.04(3) . 2_556 ? 
Mn1 Mn2 Mn1 68.93(4) 5_556 2_556 ? 
O3 Mn2 Mn1 48.43(9) . 6 ? 
O4 Mn2 Mn1 118.12(11) 5_556 6 ? 
O2 Mn2 Mn1 145.27(12) 2_556 6 ? 
O2 Mn2 Mn1 95.59(11) 5_556 6 ? 
O5 Mn2 Mn1 36.83(2) 5_556 6 ? 
O5 Mn2 Mn1 81.10(8) . 6 ? 
Mn1 Mn2 Mn1 78.27(3) 5_556 6 ? 
Mn1 Mn2 Mn1 112.37(4) 2_556 6 ? 
O3 Mn2 Mn1 48.43(9) . . ? 
O4 Mn2 Mn1 118.12(11) 5_556 . ? 
O2 Mn2 Mn1 95.59(11) 2_556 . ? 
O2 Mn2 Mn1 145.27(12) 5_556 . ? 
O5 Mn2 Mn1 81.10(8) 5_556 . ? 
O5 Mn2 Mn1 36.83(2) . . ? 
Mn1 Mn2 Mn1 112.37(4) 5_556 . ? 
Mn1 Mn2 Mn1 78.27(3) 2_556 . ? 
Mn1 Mn2 Mn1 62.13(4) 6 . ? 
C2 N2 C1 120.3(4) . . ? 
C3 N3 N4 110.9(5) . . ? 
C3 N3 C2 128.7(6) . . ? 
N4 N3 C2 120.2(5) . . ? 
C5 N4 N3 105.1(6) . . ? 
C1 N5 Mn1 129.4(4) . . ? 
C2 N6 Mn1 127.3(4) . . ? 
N5 C1 N1 119.8(5) . . ? 
N5 C1 N2 125.7(5) . . ? 
N1 C1 N2 114.5(5) . . ? 
N2 C2 N6 129.4(5) . . ? 
N2 C2 N3 114.0(5) . . ? 
N6 C2 N3 116.6(5) . . ? 
C4 C3 N3 107.5(7) . . ? 
C3 C4 C5 105.2(6) . . ? 
N4 C5 C4 111.2(7) . . ? 
C6 O1 Mn1 128.7(4) . . ? 
C6 O2 Mn2 123.8(3) . 5_556 ? 
O1 C6 O2 124.2(5) . . ? 
O1 C6 C7 117.4(5) . . ? 
O2 C6 C7 118.4(5) . . ? 
C8 O3 Mn2 123.0(4) . . ? 
C8 O3 Mn1 124.3(3) . 6 ? 
Mn2 O3 Mn1 94.43(14) . 6 ? 
C8 O3 Mn1 124.3(3) . . ? 
Mn2 O3 Mn1 94.43(14) . . ? 
Mn1 O3 Mn1 86.89(15) 6 . ? 
Mn2 O4 Mn1 96.19(15) 5_556 . ? 
Mn2 O4 Mn1 96.19(15) 5_556 6 ? 
Mn1 O4 Mn1 113.5(2) . 6 ? 
Mn1 O5 Mn1 163.4(3) . 2_556 ? 
Mn1 O5 Mn2 89.41(8) . 5_556 ? 
Mn1 O5 Mn2 101.03(9) 2_556 5_556 ? 
Mn1 O5 Mn2 101.03(9) . . ? 
Mn1 O5 Mn2 89.41(8) 2_556 . ? 
Mn2 O5 Mn2 102.53(19) 5_556 . ? 
O6 O6 C9 69.5(11) 2_655 . ? 
 
loop_ 
 _geom_torsion_atom_site_label_1 
 _geom_torsion_atom_site_label_2 
 _geom_torsion_atom_site_label_3 
 _geom_torsion_atom_site_label_4 
 _geom_torsion 
 _geom_torsion_site_symmetry_1 
 _geom_torsion_site_symmetry_2 
 _geom_torsion_site_symmetry_3 
 _geom_torsion_site_symmetry_4 
 _geom_torsion_publ_flag 
O5 Mn1 Mn2 O3 172.2(2) . . . . ? 
O4 Mn1 Mn2 O3 80.52(17) . . . . ? 
N5 Mn1 Mn2 O3 -9.5(2) . . . . ? 
N6 Mn1 Mn2 O3 -97.06(17) . . . . ? 
O1 Mn1 Mn2 O3 164.16(19) . . . . ? 
Mn2 Mn1 Mn2 O3 119.91(12) 5_556 . . . ? 
O5 Mn1 Mn2 O4 5.68(18) . . . 5_556 ? 
O4 Mn1 Mn2 O4 -85.97(13) . . . 5_556 ? 
N5 Mn1 Mn2 O4 -176.00(19) . . . 5_556 ? 
N6 Mn1 Mn2 O4 96.45(15) . . . 5_556 ? 
O1 Mn1 Mn2 O4 -2.33(17) . . . 5_556 ? 
O3 Mn1 Mn2 O4 -166.49(15) . . . 5_556 ? 
Mn2 Mn1 Mn2 O4 -46.59(9) 5_556 . . 5_556 ? 
O5 Mn1 Mn2 O2 -93.61(19) . . . 2_556 ? 
O4 Mn1 Mn2 O2 174.73(16) . . . 2_556 ? 
N5 Mn1 Mn2 O2 84.70(19) . . . 2_556 ? 
N6 Mn1 Mn2 O2 -2.85(16) . . . 2_556 ? 
O1 Mn1 Mn2 O2 -101.63(18) . . . 2_556 ? 
O3 Mn1 Mn2 O2 94.21(16) . . . 2_556 ? 
Mn2 Mn1 Mn2 O2 -145.88(11) 5_556 . . 2_556 ? 
O5 Mn1 Mn2 O2 169.8(2) . . . 5_556 ? 
O4 Mn1 Mn2 O2 78.1(2) . . . 5_556 ? 
N5 Mn1 Mn2 O2 -11.9(3) . . . 5_556 ? 
N6 Mn1 Mn2 O2 -99.5(2) . . . 5_556 ? 
O1 Mn1 Mn2 O2 161.8(2) . . . 5_556 ? 
O3 Mn1 Mn2 O2 -2.4(2) . . . 5_556 ? 
Mn2 Mn1 Mn2 O2 117.50(18) 5_556 . . 5_556 ? 
O5 Mn1 Mn2 O5 80.9(2) . . . 5_556 ? 
O4 Mn1 Mn2 O5 -10.71(13) . . . 5_556 ? 
N5 Mn1 Mn2 O5 -100.74(18) . . . 5_556 ? 
N6 Mn1 Mn2 O5 171.71(14) . . . 5_556 ? 
O1 Mn1 Mn2 O5 72.93(16) . . . 5_556 ? 
O3 Mn1 Mn2 O5 -91.23(13) . . . 5_556 ? 
Mn2 Mn1 Mn2 O5 28.68(6) 5_556 . . 5_556 ? 
O4 Mn1 Mn2 O5 -91.7(2) . . . . ? 
N5 Mn1 Mn2 O5 178.3(2) . . . . ? 
N6 Mn1 Mn2 O5 90.8(2) . . . . ? 
O1 Mn1 Mn2 O5 -8.0(2) . . . . ? 
O3 Mn1 Mn2 O5 -172.2(2) . . . . ? 
Mn2 Mn1 Mn2 O5 -52.27(16) 5_556 . . . ? 
O5 Mn1 Mn2 Mn1 52.27(16) . . . 5_556 ? 
O4 Mn1 Mn2 Mn1 -39.39(12) . . . 5_556 ? 
N5 Mn1 Mn2 Mn1 -129.42(17) . . . 5_556 ? 
N6 Mn1 Mn2 Mn1 143.03(13) . . . 5_556 ? 
O1 Mn1 Mn2 Mn1 44.26(14) . . . 5_556 ? 
O3 Mn1 Mn2 Mn1 -119.91(12) . . . 5_556 ? 
Mn2 Mn1 Mn2 Mn1 0.0 5_556 . . 5_556 ? 
O5 Mn1 Mn2 Mn1 -8.87(16) . . . 2_556 ? 
O4 Mn1 Mn2 Mn1 -100.53(13) . . . 2_556 ? 
N5 Mn1 Mn2 Mn1 169.44(17) . . . 2_556 ? 
N6 Mn1 Mn2 Mn1 81.89(12) . . . 2_556 ? 
O1 Mn1 Mn2 Mn1 -16.89(15) . . . 2_556 ? 
O3 Mn1 Mn2 Mn1 178.95(12) . . . 2_556 ? 
Mn2 Mn1 Mn2 Mn1 -61.14(3) 5_556 . . 2_556 ? 
O5 Mn1 Mn2 Mn1 114.47(16) . . . 6 ? 
O4 Mn1 Mn2 Mn1 22.81(12) . . . 6 ? 
N5 Mn1 Mn2 Mn1 -67.22(17) . . . 6 ? 
N6 Mn1 Mn2 Mn1 -154.77(12) . . . 6 ? 
O1 Mn1 Mn2 Mn1 106.45(14) . . . 6 ? 
O3 Mn1 Mn2 Mn1 -57.71(12) . . . 6 ? 
Mn2 Mn1 Mn2 Mn1 62.20(2) 5_556 . . 6 ? 
C3 N3 N4 C5 -1.1(8) . . . . ? 
C2 N3 N4 C5 -175.8(6) . . . . ? 
O4 Mn1 N5 C1 -164.9(4) . . . . ? 
N6 Mn1 N5 C1 11.1(5) . . . . ? 
O1 Mn1 N5 C1 105.6(5) . . . . ? 
O3 Mn1 N5 C1 -84.8(5) . . . . ? 
Mn2 Mn1 N5 C1 -177.2(4) 5_556 . . . ? 
Mn2 Mn1 N5 C1 -79.1(5) . . . . ? 
O5 Mn1 N6 C2 166.3(4) . . . . ? 
N5 Mn1 N6 C2 -7.2(4) . . . . ? 
O1 Mn1 N6 C2 -102.8(4) . . . . ? 
O3 Mn1 N6 C2 87.0(4) . . . . ? 
Mn2 Mn1 N6 C2 -178.1(3) 5_556 . . . ? 
Mn2 Mn1 N6 C2 124.1(4) . . . . ? 
Mn1 N5 C1 N1 172.7(4) . . . . ? 
Mn1 N5 C1 N2 -7.0(8) . . . . ? 
C2 N2 C1 N5 -5.6(9) . . . . ? 
C2 N2 C1 N1 174.7(5) . . . . ? 
C1 N2 C2 N6 10.1(9) . . . . ? 
C1 N2 C2 N3 -171.2(5) . . . . ? 
Mn1 N6 C2 N2 -1.5(8) . . . . ? 
Mn1 N6 C2 N3 179.8(3) . . . . ? 
C3 N3 C2 N2 7.9(9) . . . . ? 
N4 N3 C2 N2 -178.5(5) . . . . ? 
C3 N3 C2 N6 -173.3(6) . . . . ? 
N4 N3 C2 N6 0.4(8) . . . . ? 
N4 N3 C3 C4 1.1(8) . . . . ? 
C2 N3 C3 C4 175.3(6) . . . . ? 
N3 C3 C4 C5 -0.7(9) . . . . ? 
N3 N4 C5 C4 0.6(9) . . . . ? 
C3 C4 C5 N4 0.1(10) . . . . ? 
O5 Mn1 O1 C6 -52.8(5) . . . . ? 
O4 Mn1 O1 C6 34.1(5) . . . . ? 
N5 Mn1 O1 C6 127.8(5) . . . . ? 
N6 Mn1 O1 C6 -145.2(5) . . . . ? 
O3 Mn1 O1 C6 -7.0(10) . . . . ? 
Mn2 Mn1 O1 C6 -5.9(5) 5_556 . . . ? 
Mn2 Mn1 O1 C6 -47.5(6) . . . . ? 
Mn1 O1 C6 O2 9.6(9) . . . . ? 
Mn1 O1 C6 C7 -168.9(4) . . . . ? 
Mn2 O2 C6 O1 -7.0(8) 5_556 . . . ? 
Mn2 O2 C6 C7 171.5(4) 5_556 . . . ? 
O4 Mn2 O3 C8 180.000(2) 5_556 . . . ? 
O2 Mn2 O3 C8 44.99(10) 2_556 . . . ? 
O2 Mn2 O3 C8 -44.99(10) 5_556 . . . ? 
O5 Mn2 O3 C8 -141.09(9) 5_556 . . . ? 
O5 Mn2 O3 C8 141.09(9) . . . . ? 
Mn1 Mn2 O3 C8 -135.11(8) 5_556 . . . ? 
Mn1 Mn2 O3 C8 135.11(8) 2_556 . . . ? 
Mn1 Mn2 O3 C8 -136.39(8) 6 . . . ? 
Mn1 Mn2 O3 C8 136.39(8) . . . . ? 
O4 Mn2 O3 Mn1 -43.61(8) 5_556 . . 6 ? 
O2 Mn2 O3 Mn1 -178.62(12) 2_556 . . 6 ? 
O2 Mn2 O3 Mn1 91.41(13) 5_556 . . 6 ? 
O5 Mn2 O3 Mn1 -4.70(12) 5_556 . . 6 ? 
O5 Mn2 O3 Mn1 -82.51(13) . . . 6 ? 
Mn1 Mn2 O3 Mn1 1.28(15) 5_556 . . 6 ? 
Mn1 Mn2 O3 Mn1 -88.49(4) 2_556 . . 6 ? 
Mn1 Mn2 O3 Mn1 -87.21(16) . . . 6 ? 
O4 Mn2 O3 Mn1 43.61(8) 5_556 . . . ? 
O2 Mn2 O3 Mn1 -91.41(13) 2_556 . . . ? 
O2 Mn2 O3 Mn1 178.62(12) 5_556 . . . ? 
O5 Mn2 O3 Mn1 82.51(13) 5_556 . . . ? 
O5 Mn2 O3 Mn1 4.70(12) . . . . ? 
Mn1 Mn2 O3 Mn1 88.49(4) 5_556 . . . ? 
Mn1 Mn2 O3 Mn1 -1.28(15) 2_556 . . . ? 
Mn1 Mn2 O3 Mn1 87.21(16) 6 . . . ? 
O5 Mn1 O3 C8 -140.9(5) . . . . ? 
O4 Mn1 O3 C8 130.3(5) . . . . ? 
N5 Mn1 O3 C8 37.3(5) . . . . ? 
N6 Mn1 O3 C8 -49.8(5) . . . . ? 
O1 Mn1 O3 C8 172.2(6) . . . . ? 
Mn2 Mn1 O3 C8 171.1(4) 5_556 . . . ? 
Mn2 Mn1 O3 C8 -135.6(5) . . . . ? 
O5 Mn1 O3 Mn2 -5.34(13) . . . . ? 
O4 Mn1 O3 Mn2 -94.17(17) . . . . ? 
N5 Mn1 O3 Mn2 172.85(16) . . . . ? 
N6 Mn1 O3 Mn2 85.81(16) . . . . ? 
O1 Mn1 O3 Mn2 -52.2(6) . . . . ? 
Mn2 Mn1 O3 Mn2 -53.31(10) 5_556 . . . ? 
O5 Mn1 O3 Mn1 88.87(14) . . . 6 ? 
O4 Mn1 O3 Mn1 0.04(16) . . . 6 ? 
N5 Mn1 O3 Mn1 -92.95(16) . . . 6 ? 
N6 Mn1 O3 Mn1 -179.99(16) . . . 6 ? 
O1 Mn1 O3 Mn1 42.0(7) . . . 6 ? 
Mn2 Mn1 O3 Mn1 40.90(10) 5_556 . . 6 ? 
Mn2 Mn1 O3 Mn1 94.21(14) . . . 6 ? 
O5 Mn1 O4 Mn2 20.05(14) . . . 5_556 ? 
N5 Mn1 O4 Mn2 -166.60(16) . . . 5_556 ? 
O1 Mn1 O4 Mn2 -70.76(16) . . . 5_556 ? 
O3 Mn1 O4 Mn2 99.47(17) . . . 5_556 ? 
Mn2 Mn1 O4 Mn2 62.24(12) . . . 5_556 ? 
O5 Mn1 O4 Mn1 -79.5(2) . . . 6 ? 
N5 Mn1 O4 Mn1 93.9(2) . . . 6 ? 
O1 Mn1 O4 Mn1 -170.3(2) . . . 6 ? 
O3 Mn1 O4 Mn1 0.0(2) . . . 6 ? 
Mn2 Mn1 O4 Mn1 -99.5(3) 5_556 . . 6 ? 
Mn2 Mn1 O4 Mn1 -37.28(19) . . . 6 ? 
O4 Mn1 O5 Mn1 -146.99(11) . . . 2_556 ? 
N6 Mn1 O5 Mn1 36.97(12) . . . 2_556 ? 
O1 Mn1 O5 Mn1 -57.88(10) . . . 2_556 ? 
O3 Mn1 O5 Mn1 132.81(8) . . . 2_556 ? 
Mn2 Mn1 O5 Mn1 -129.34(9) 5_556 . . 2_556 ? 
Mn2 Mn1 O5 Mn1 128.01(12) . . . 2_556 ? 
O4 Mn1 O5 Mn2 -17.65(14) . . . 5_556 ? 
N6 Mn1 O5 Mn2 166.31(15) . . . 5_556 ? 
O1 Mn1 O5 Mn2 71.46(14) . . . 5_556 ? 
O3 Mn1 O5 Mn2 -97.85(13) . . . 5_556 ? 
Mn2 Mn1 O5 Mn2 -102.7(2) . . . 5_556 ? 
O4 Mn1 O5 Mn2 85.00(16) . . . . ? 
N6 Mn1 O5 Mn2 -91.04(17) . . . . ? 
O1 Mn1 O5 Mn2 174.11(15) . . . . ? 
O3 Mn1 O5 Mn2 4.80(12) . . . . ? 
Mn2 Mn1 O5 Mn2 102.7(2) 5_556 . . . ? 
O3 Mn2 O5 Mn1 -5.87(14) . . . . ? 
O4 Mn2 O5 Mn1 -174.93(16) 5_556 . . . ? 
O2 Mn2 O5 Mn1 90.47(17) 2_556 . . . ? 
O5 Mn2 O5 Mn1 -91.86(13) 5_556 . . . ? 
Mn1 Mn2 O5 Mn1 -132.96(13) 5_556 . . . ? 
Mn1 Mn2 O5 Mn1 167.0(2) 2_556 . . . ? 
Mn1 Mn2 O5 Mn1 -54.53(12) 6 . . . ? 
O3 Mn2 O5 Mn1 -172.84(14) . . . 2_556 ? 
O4 Mn2 O5 Mn1 18.10(12) 5_556 . . 2_556 ? 
O2 Mn2 O5 Mn1 -76.50(15) 2_556 . . 2_556 ? 
O5 Mn2 O5 Mn1 101.17(11) 5_556 . . 2_556 ? 
Mn1 Mn2 O5 Mn1 60.07(11) 5_556 . . 2_556 ? 
Mn1 Mn2 O5 Mn1 138.50(11) 6 . . 2_556 ? 
Mn1 Mn2 O5 Mn1 -167.0(2) . . . 2_556 ? 
O3 Mn2 O5 Mn2 86.00(8) . . . 5_556 ? 
O4 Mn2 O5 Mn2 -83.07(9) 5_556 . . 5_556 ? 
O2 Mn2 O5 Mn2 -177.66(12) 2_556 . . 5_556 ? 
O5 Mn2 O5 Mn2 0.0 5_556 . . 5_556 ? 
Mn1 Mn2 O5 Mn2 -41.099(19) 5_556 . . 5_556 ? 
Mn1 Mn2 O5 Mn2 -101.17(11) 2_556 . . 5_556 ? 
Mn1 Mn2 O5 Mn2 37.33(2) 6 . . 5_556 ? 
Mn1 Mn2 O5 Mn2 91.86(13) . . . 5_556 ? 
 
_diffrn_measured_fraction_theta_max    0.990 
_diffrn_reflns_theta_full              27.61 
_diffrn_measured_fraction_theta_full   0.990 
_refine_diff_density_max    0.887 
_refine_diff_density_min   -0.516 
_refine_diff_density_rms    0.112 
